# Supplementary material for: Synergetic magnetic and luminescence switching via solid state phase transitions of the dysprosium–dianthracene complex
Source: Royal Society of Chemistry journal article supplement (doi:10.1039/d0tc01111h), 2020-01-01
Supplement: d0tc01111h1.pdf [file d0tc01111h1.pdf]

## Supporting Information for

### **Synergetic magnetic and luminescence switching via thermo-induced solid state phase transitions of dysprosium-dianthracene complex**

Jing-Cui Liu,<sup>a,†</sup> Xin-Da Huang,<sup>a,†</sup> Qian Zou,<sup>a</sup> Song-Song Bao,<sup>a</sup> Xi-Zhang Wang,<sup>b</sup> Jing-Yuan Ma,<sup>c</sup> Li-Min Zheng<sup>\*,a</sup>

<sup>a</sup> State Key Laboratory of Coordination Chemistry, School of Chemistry and Chemical Engineering, Collaborative Innovation Center of Advanced Microstructures, Nanjing University, Nanjing 210023, P. R. China

<sup>b</sup> Key Laboratory of Mesoscopic Chemistry of MOE, School of Chemistry and Chemical Engineering, Nanjing University, Nanjing 210023, P. R. China

<sup>c</sup> Shanghai Synchrotron Radiation Facility, Chinese Academia Science, Shanghai 201204, P. R. China

\*correspondence to: lmzheng@nju.edu.cn

**Table S1. Selected bond lengths (Å) and angles (°) for 1-Ln and 1-Dy-170-2min.**

| Sample     | 1-Dy       | 1-Dy-170-2min | 1-Gd       |
|------------|------------|---------------|------------|
| Ln1-Cl1    | 2.6454(11) | 2.6485(19)    | 2.6741(14) |
| Ln1-O1     | 2.277(2)   | 2.288(5)      | 2.300(4)   |
| Ln1-O4     | 2.196(3)   | 2.199(5)      | 2.229(4)   |
| Ln1-O5     | 2.201(2)   | 2.198(5)      | 2.223(4)   |
| Ln1-N1     | 2.555(3)   | 2.557(6)      | 2.590(4)   |
| Ln1-N2     | 2.527(3)   | 2.526(5)      | 2.550(5)   |
| Ln1-N3     | 2.540(3)   | 2.540(7)      | 2.576(4)   |
| C6-C13     | 1.636(5)   | 2.433(2)      | 1.652(7)   |
| Cl1-Ln1-O1 | 164.60(6)  | 165.67(14)    | 164.00(10) |
| Cl1-Ln1-O4 | 98.02(7)   | 98.23(15)     | 98.24(10)  |
| Cl1-Ln1-O5 | 97.66(7)   | 97.71(14)     | 98.07(11)  |
| Cl1-Ln1-N1 | 90.30(7)   | 91.48(14)     | 90.55(11)  |
| Cl1-Ln1-N2 | 84.24(7)   | 85.53(13)     | 83.90(12)  |
| Cl1-Ln1-N3 | 87.78(7)   | 87.94(17)     | 87.68(10)  |
| O1-Ln1-O4  | 95.56(9)   | 94.4(2)       | 95.93(14)  |
| O1-Ln1-O5  | 91.22(9)   | 90.7(2)       | 90.71(14)  |
| O1-Ln1-N1  | 87.12(9)   | 86.1(2)       | 87.11(15)  |
| O1-Ln1-N2  | 80.82(9)   | 80.54(18)     | 80.67(15)  |
| O1-Ln1-N3  | 82.99(9)   | 83.6(2)       | 82.39(14)  |
| O4-Ln1-O5  | 82.69(9)   | 82.3(2)       | 84.21(14)  |
| O4-Ln1-N1  | 71.61(9)   | 71.5(2)       | 70.74(15)  |
| O4-Ln1-N2  | 137.89(9)  | 138.0(2)      | 137.02(14) |
| O4-Ln1-N3  | 154.72(9)  | 154.3(2)      | 155.81(14) |
| O5-Ln1-N1  | 153.94(9)  | 153.28(19)    | 154.46(15) |
| O5-Ln1-N2  | 138.98(9)  | 138.91(19)    | 138.31(14) |
| O5-Ln1-N3  | 72.13(9)   | 72.2(2)       | 71.72(14)  |
| N1-Ln1-N2  | 66.32(9)   | 66.58(19)     | 66.30(15)  |
| N1-Ln1-N3  | 133.23(9)  | 133.5(2)      | 132.93(14) |
| N2-Ln1-N3  | 66.99(9)   | 67.0(2)       | 66.75(13)  |

**Table S2.** Coordination geometry for compounds **1-Ln** and **1-Dy-170-2min** at 173K.

| Coordination geometry                                | <b>1-Dy</b>  | <b>1-Dy-170-2min</b> | <b>1-Gd</b>  |
|------------------------------------------------------|--------------|----------------------|--------------|
| Heptagon ( $D_{7h}$ )                                | 34.43        | 34.558               | 34.21        |
| Hexagonal pyramid ( $C_{6v}$ )                       | 24.93        | 25.167               | 24.87        |
| Pentagonal bipyramid ( $D_{5h}$ )                    | <b>0.538</b> | <b>0.554</b>         | <b>0.600</b> |
| Capped octahedron ( $C_{3v}$ )                       | 8.025        | 8.017                | 7.964        |
| Capped trigonal prism ( $C_{2v}$ )                   | 6.553        | 6.577                | 6.533        |
| Johnson pentagonal bipyramid J13 ( $D_{5h}$ )        | 4.448        | 4.523                | 4.475        |
| Johnson elongated triangular pyramid J7 ( $C_{3v}$ ) | 24.04        | 24.102               | 23.93        |

**Table S3.** Forward Fourier Transform and backward Fourier Transform selected parameters of the Dy-N/O/Cl shell at Dy-L<sub>3</sub> edge of **1-Dy** and the related complexes.

| Sample      | Shell     | K-range        | Window type | R-range     | Window type |
|-------------|-----------|----------------|-------------|-------------|-------------|
| <b>1-Dy</b> | Dy-O/N/Cl | 2.772 – 11.425 | Hanning     | 1.25 – 2.51 | Hanning     |
| <b>2-Dy</b> | Dy-O/N/Cl | 2.772 – 11.425 | Hanning     | 1.25 – 2.53 | Hanning     |
| <b>3-Dy</b> | Dy-O/N    | 2.788 – 11.425 | Hanning     | 1.20 – 2.53 | Hanning     |

**Table S4.** Forward Fourier Transform and backward Fourier Transform selected parameters of the Gd-N/O/Cl shell at Gd-L<sub>3</sub> edge of **1-Gd** and the related complexes.

| Sample      | Shell     | K-range        | Window type | R-range     | Window type |
|-------------|-----------|----------------|-------------|-------------|-------------|
| <b>1-Gd</b> | Gd-O/N/Cl | 2.793 – 11.300 | Hanning     | 1.25 – 2.56 | Hanning     |
| <b>2-Gd</b> | Gd-O/N/Cl | 2.835 – 11.300 | Hanning     | 1.25 – 2.55 | Hanning     |
| <b>3-Gd</b> | Gd-O/N    | 2.811 – 11.300 | Hanning     | 1.25 – 2.54 | Hanning     |

**Table S5.** Local structural fitting parameters of the Gd-O, Gd-N and Gd-Cl shells around Gd.

| Sample      | Shell | R    | N          | S <sub>0</sub> <sup>2</sup> <sup>b</sup> | ΔE <sub>0</sub> | ΔR              | σ <sup>2</sup>  | R-factor <sup>a</sup> |
|-------------|-------|------|------------|------------------------------------------|-----------------|-----------------|-----------------|-----------------------|
| <b>1-Gd</b> | Gd-O  | 2.24 | <b>3</b>   | 1.0                                      | 4.1 ± 1.8       | 0.010 ± 0.008   | 0.0072 ± 0.0028 | 0.0012                |
|             | Gd-N  | 2.44 | <b>3</b>   | 1.0                                      | 5.8 ± 1.1       | -0.12 ± 0.01    | 0.0067 ± 0.0061 |                       |
|             | Gd-Cl | 2.69 | <b>1</b>   | 1.0                                      | -2.4 ± 2.9      | 0.0088 ± 0.0086 | 0.0014 ± 0.0010 |                       |
| <b>2-Gd</b> | Gd-O  | 2.24 | <b>3</b>   | 1.0                                      | 3.4 ± 2.2       | 0.0096 ± 0.0068 | 0.0080 ± 0.0024 | 0.0059                |
|             | Gd-N  | 2.45 | <b>3</b>   | 1.0                                      | 7.0 ± 1.4       | -0.11 ± 0.01    | 0.011 ± 0.008   |                       |
|             | Gd-Cl | 2.67 | <b>0.9</b> | 1.0                                      | -3.6 ± 2.4      | 0.00 ± 0.01     | 0.0014 ± 0.0005 |                       |
| <b>3-Gd</b> | Gd-O  | 2.28 | <b>4</b>   | 1.0                                      | 7.6 ± 0.5       | 0.055 ± 0.004   | 0.0059 ± 0.0007 | 0.0070                |
|             | Gd-N  | 2.54 | <b>3</b>   | 1.0                                      | 8.4 ± 0.8       | -0.019 ± 0.007  | 0.0033 ± 0.0010 |                       |

<sup>a</sup> R-factor by *k*-weight = 2; <sup>b</sup> fixed to 1.0.

**Table S6.** The fit parameters obtained from analyses of the ac susceptibilities of **1-Dy** under 500 Oe bias field.

| $T / K$ | $\chi_T / \text{cm}^3 \text{mol}^{-1}$ | $\chi_S / \text{cm}^3 \text{mol}^{-1}$ | $\tau / 10^{-4} \text{ s}$ | $\alpha$ | Residual |
|---------|----------------------------------------|----------------------------------------|----------------------------|----------|----------|
| 1.8     | 4.15                                   | 1.52                                   | 9.77                       | 0.084    | 0.051    |
| 2.0     | 3.75                                   | 1.42                                   | 7.46                       | 0.073    | 0.025    |
| 2.2     | 3.43                                   | 1.32                                   | 5.41                       | 0.064    | 0.017    |
| 2.4     | 3.18                                   | 1.22                                   | 3.67                       | 0.065    | 0.012    |
| 2.6     | 2.97                                   | 1.09                                   | 2.37                       | 0.078    | 0.015    |
| 2.8     | 2.77                                   | 0.88                                   | 1.36                       | 0.010    | 0.010    |
| 3.0     | 2.60                                   | 0.47                                   | 0.68                       | 0.112    | 0.004    |
| 3.2     | 2.45                                   | 0                                      | 0.36                       | 0.100    | 0.006    |

**Table S7.** The relaxation parameters for all dysprosium samples.

| Compounds            | $U_{\text{eff}} / K$ | $\tau_0 / \text{ s}$  | $C / \text{s}^{-1} \text{K}^{-n}$ | $n$ |
|----------------------|----------------------|-----------------------|-----------------------------------|-----|
| <b>1-Dy</b>          | 39.0                 | $2.2 \times 10^{-10}$ | 196                               | 2.8 |
| <b>2-Dy</b>          | 14.6                 | $1.5 \times 10^{-7}$  |                                   |     |
| <b>3-Dy</b>          | 14.7                 | $1.4 \times 10^{-7}$  |                                   |     |
| <b>1-Dy-170-2min</b> | 14.8                 | $9.6 \times 10^{-8}$  |                                   |     |
| <b>1-Dy'</b>         | 40.1                 | $9.1 \times 10^{-11}$ | 311                               | 2.4 |

**Table S8.** The fit parameters obtained from analyses of the ac susceptibilities of **1-Dy'** under 500 Oe bias field.

| $T / K$ | $\chi_T / \text{cm}^3 \text{mol}^{-1}$ | $\chi_S / \text{cm}^3 \text{mol}^{-1}$ | $\tau / 10^{-4} \text{ s}$ | $\alpha$ | Residual |
|---------|----------------------------------------|----------------------------------------|----------------------------|----------|----------|
| 1.8     | 4.06                                   | 1.62                                   | 7.89                       | 0.08     | 0.17     |
| 2.0     | 3.70                                   | 1.52                                   | 6.25                       | 0.07     | 0.06     |
| 2.2     | 3.41                                   | 1.42                                   | 4.60                       | 0.07     | 0.04     |
| 2.4     | 3.14                                   | 1.31                                   | 3.13                       | 0.06     | 0.02     |
| 2.6     | 2.94                                   | 1.08                                   | 1.86                       | 0.11     | 0.05     |
| 2.8     | 2.72                                   | 0.89                                   | 1.11                       | 0.10     | 0.05     |
| 3.0     | 2.57                                   | 0.09                                   | 0.43                       | 0.15     | 0.02     |

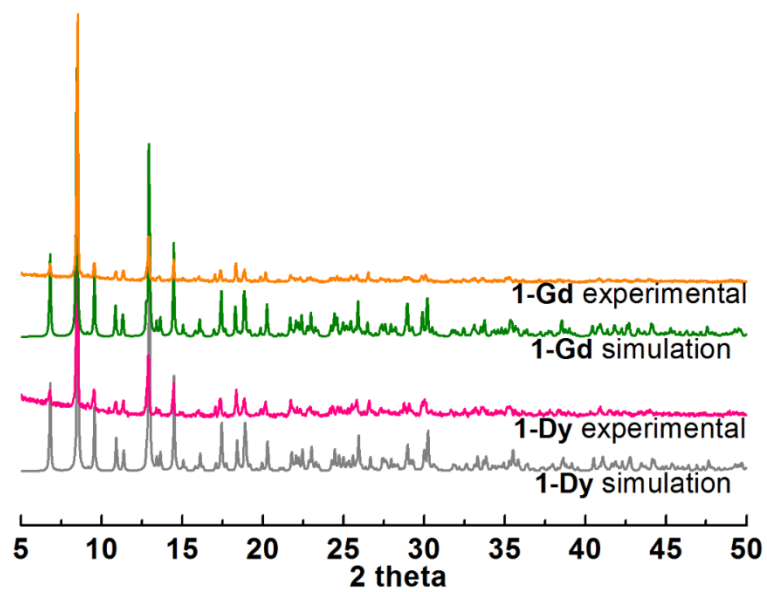

**Figure S1.** Experimental and simulated XRD patterns of compounds **1-Ln** (Ln = Gd, Dy).

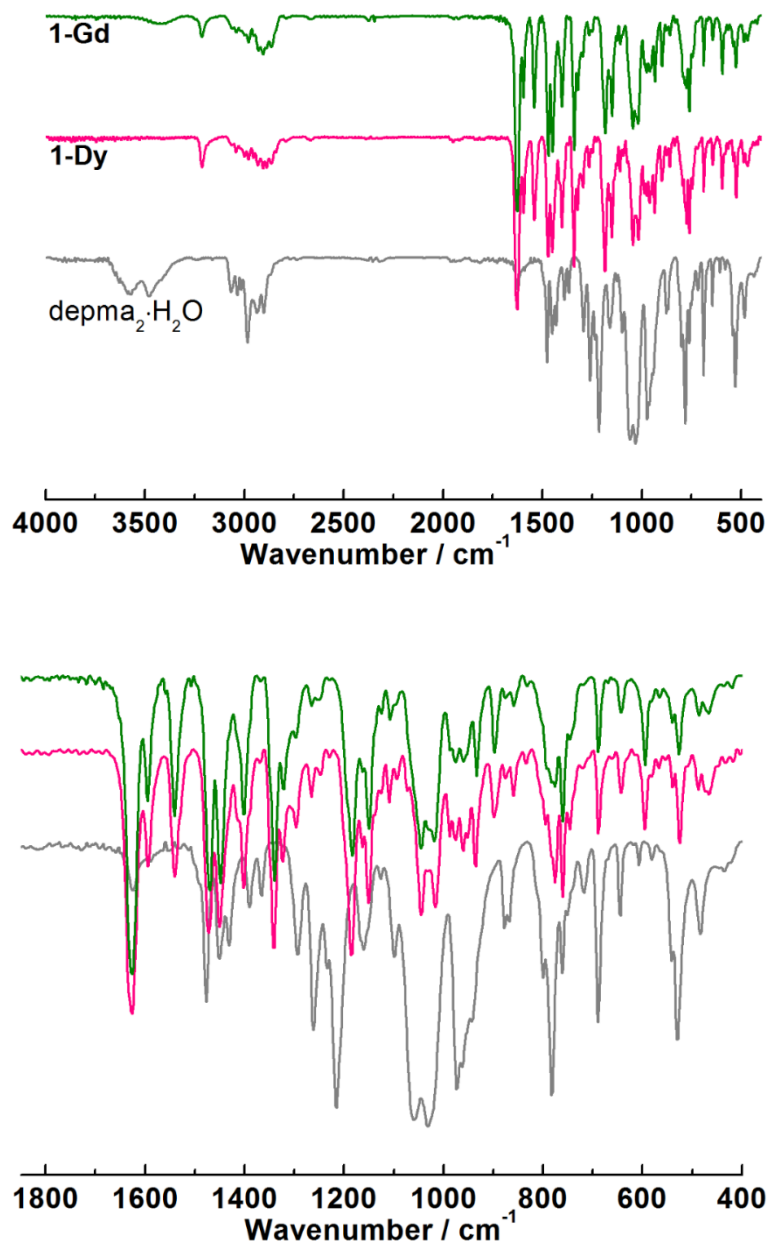

**Figure S2.** Infrared spectra of  $\text{depma}_2 \cdot \text{H}_2\text{O}$  and compounds **1-Ln** (Ln = Gd, Dy).

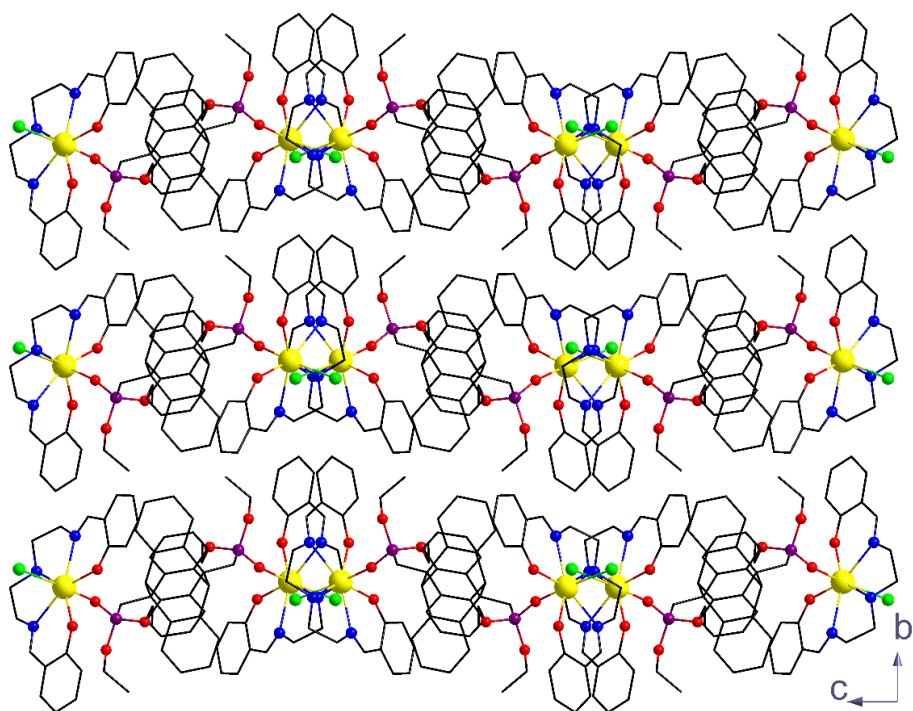

**Figure S3.** Packing diagram of compound **1-Dy** viewed along the a-axis.



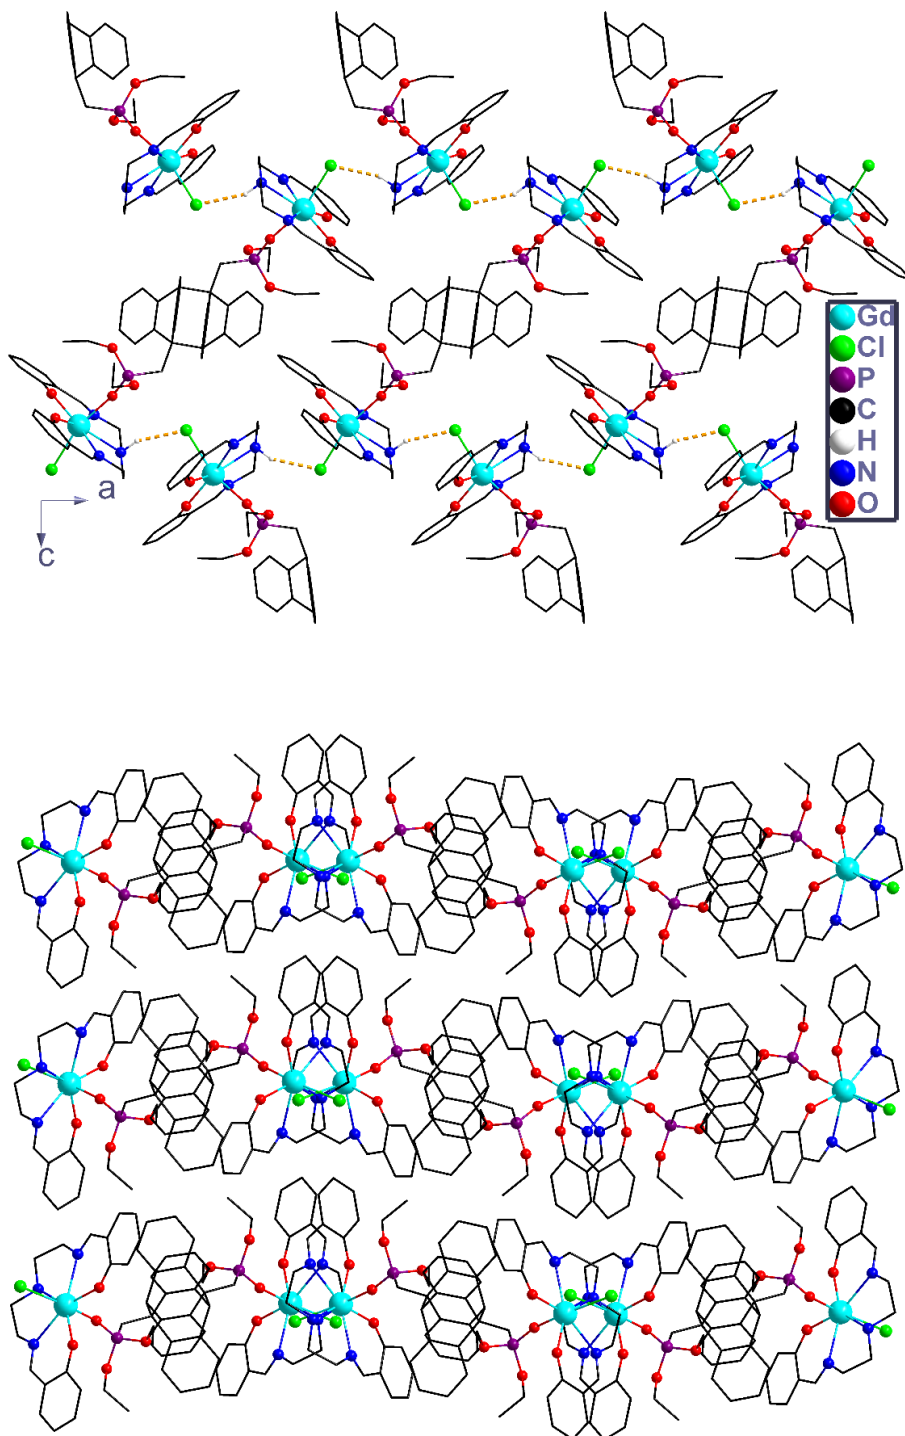

**Figure S4.** Layer structure of compound **1-Gd** formed by hydrogen bond (top); Packing diagram of compound **1-Gd** viewed along the a-axis (bottom).

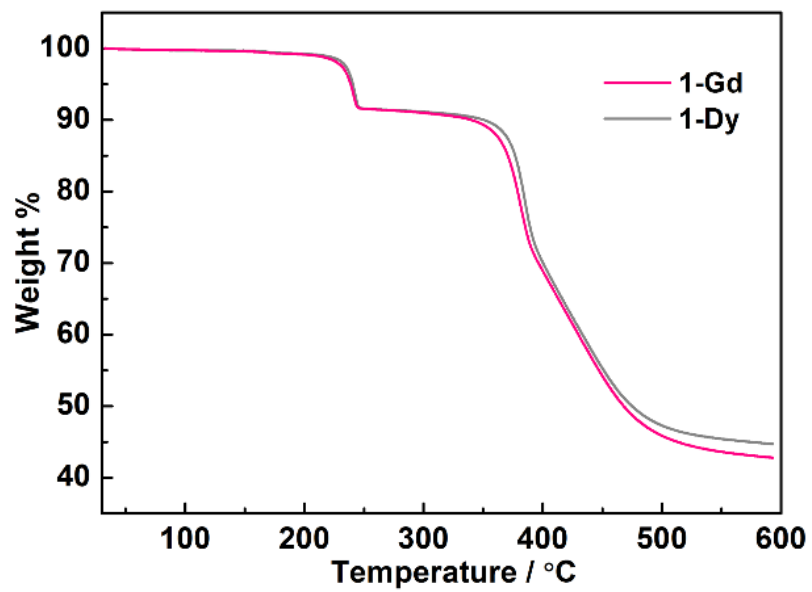

**Figure S5.** Thermogravimetric analysis for compounds 1-Ln.

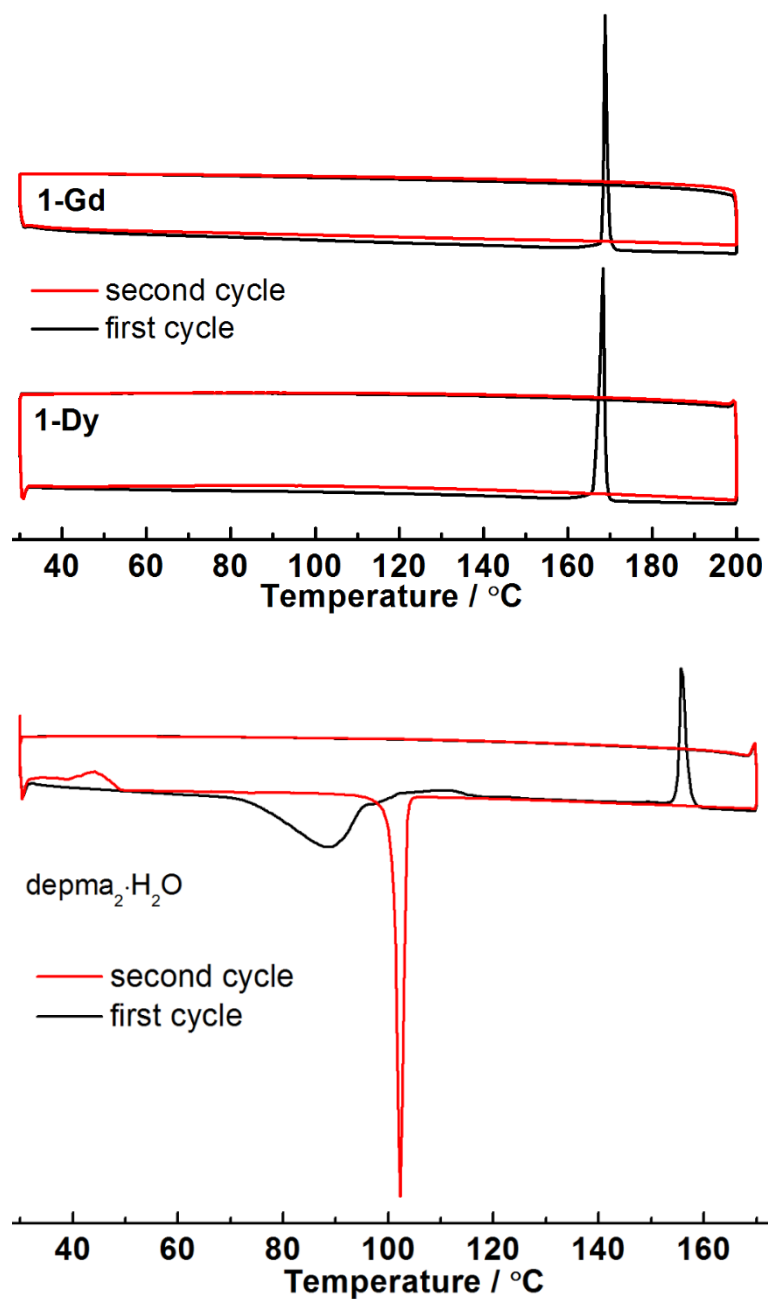

**Figure S6.** DSC curves for compounds **1-Ln** in the temperature range 30 – 200 °C (top) and depma<sub>2</sub>·H<sub>2</sub>O (bottom) tested at a heating rate of 5 °C/min (black curve for the first cycle, red curve for the second cycle).

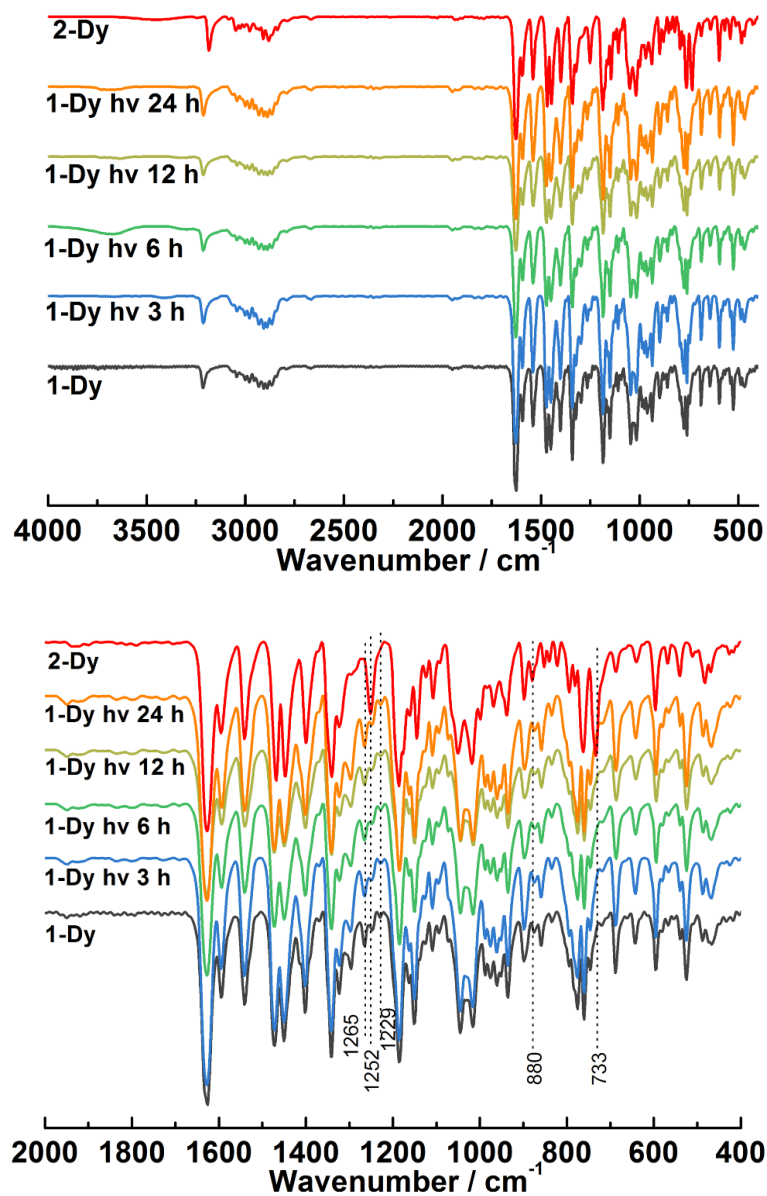

**Figure S7.** IR spectra for compound **1-Dy** before and after light irradiation at 254 nm for different period of time. The IR spectrum of **2-Dy** is also presented for comparison.

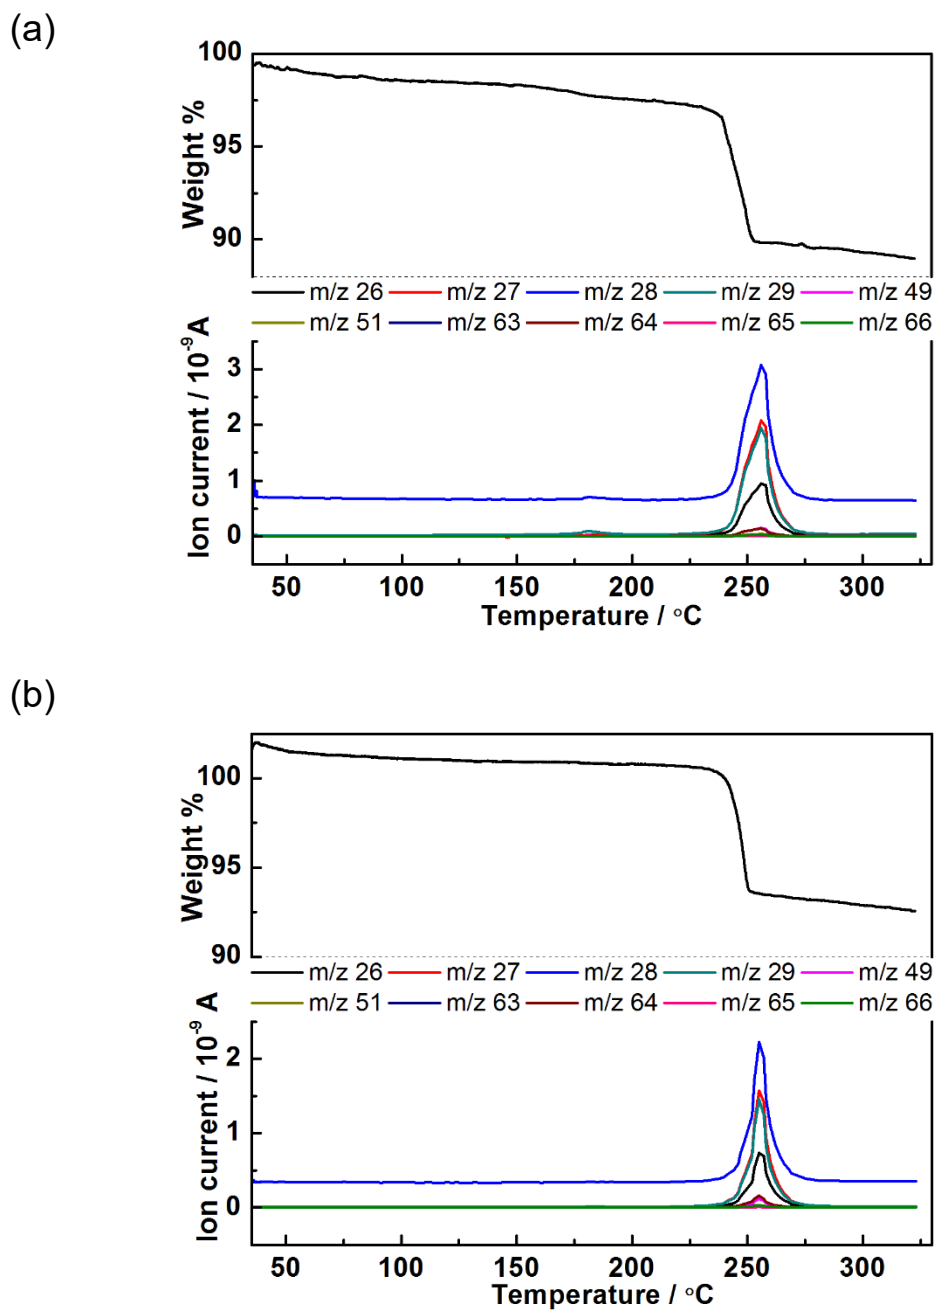

**Figure S8.** TG-MS curves for compounds **1-Dy** (a) and **1-Gd** (b). The assignment of the peaks: m/z 26, C<sub>2</sub>H<sub>2</sub>; m/z 27, C<sub>2</sub>H<sub>3</sub>; m/z 28, C<sub>2</sub>H<sub>4</sub>; m/z 29, C<sub>2</sub>H<sub>5</sub>; m/z 49, CH<sub>2</sub><sup>35</sup>Cl; m/z 51, CH<sub>2</sub><sup>37</sup>Cl; m/z 63, CH<sub>2</sub>CH<sub>2</sub><sup>35</sup>Cl; m/z 64, CH<sub>3</sub>CH<sub>2</sub><sup>35</sup>Cl; m/z 65, CH<sub>2</sub>CH<sub>2</sub><sup>37</sup>Cl; m/z 66, CH<sub>3</sub>CH<sub>2</sub><sup>37</sup>Cl.

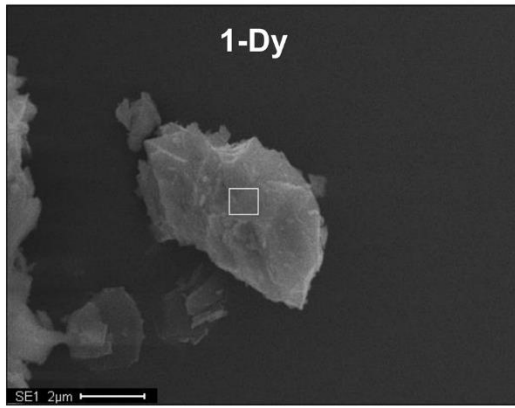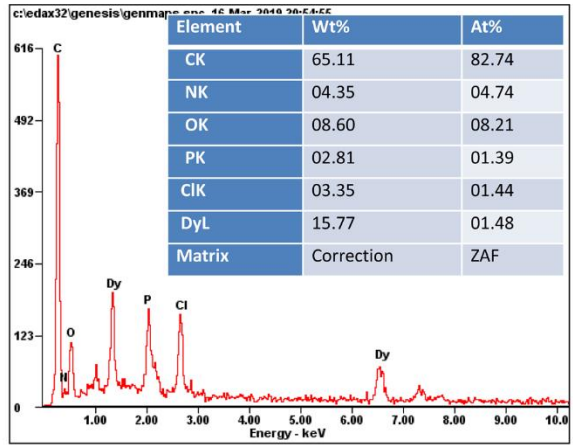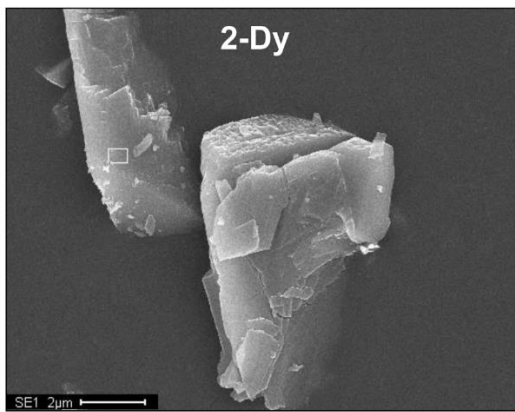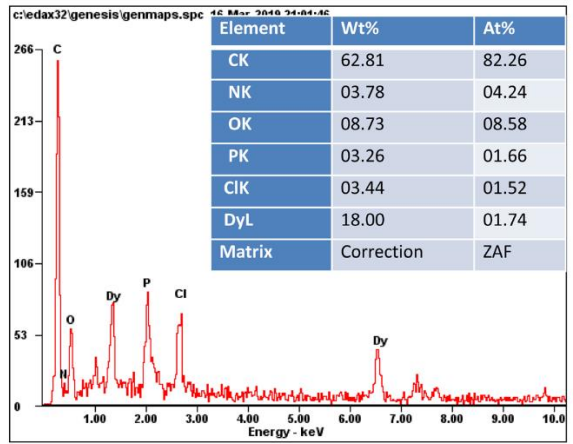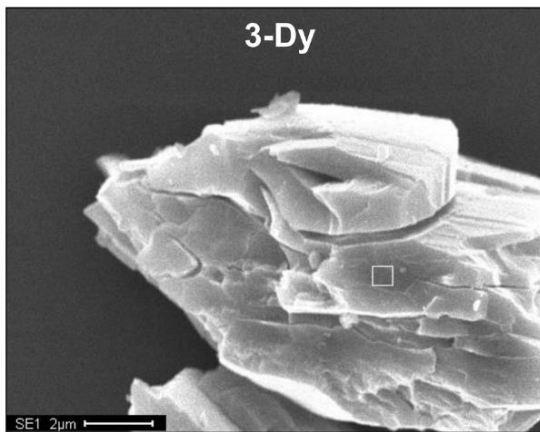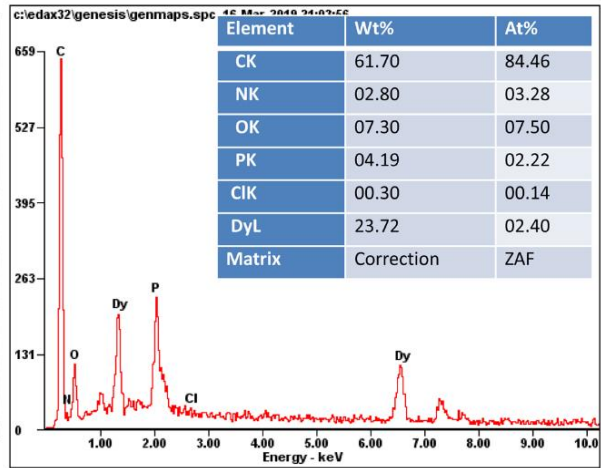

Figure S9. EDX spectra of 1-Dy, 2-Dy and 3-Dy.

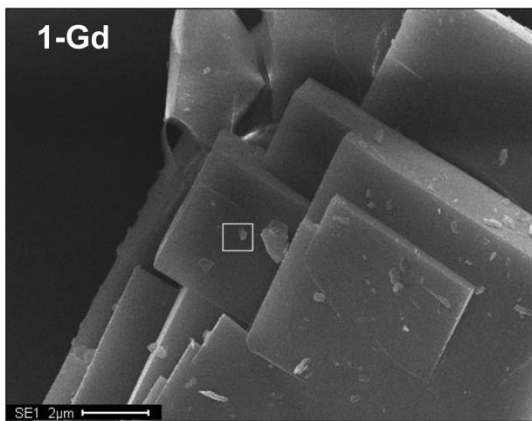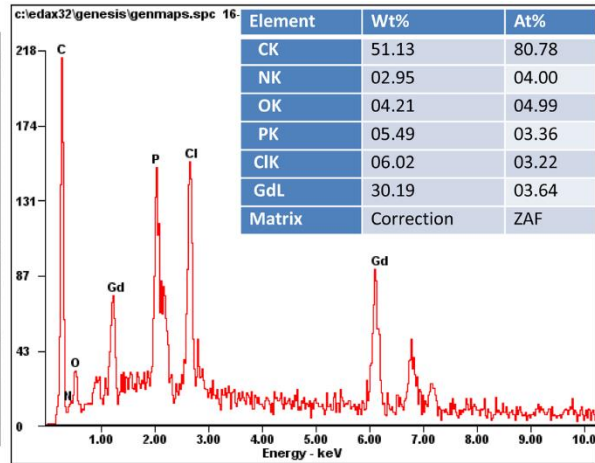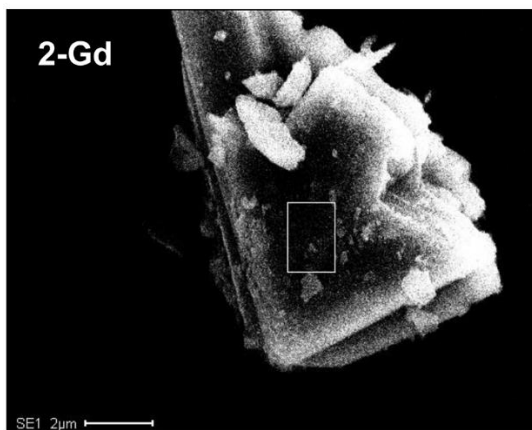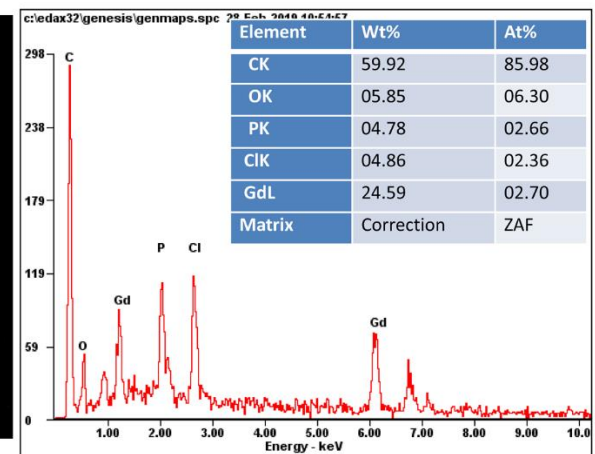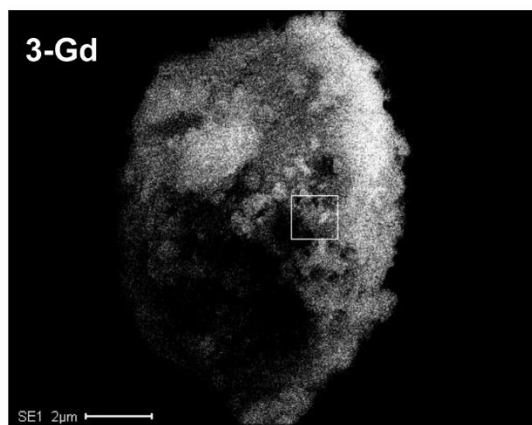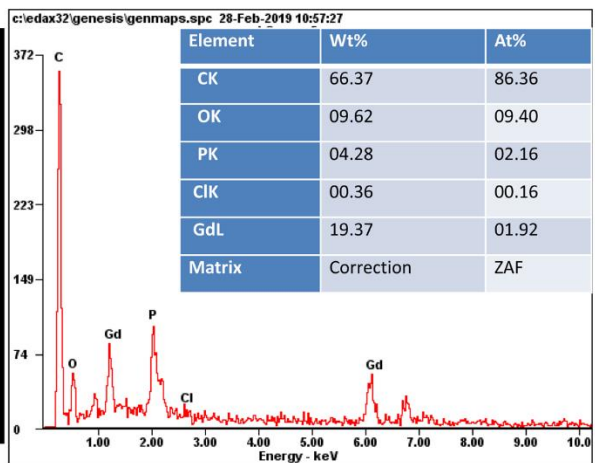

**Figure S10.** EDX spectra of 1-Gd, 2-Gd and 3-Gd.

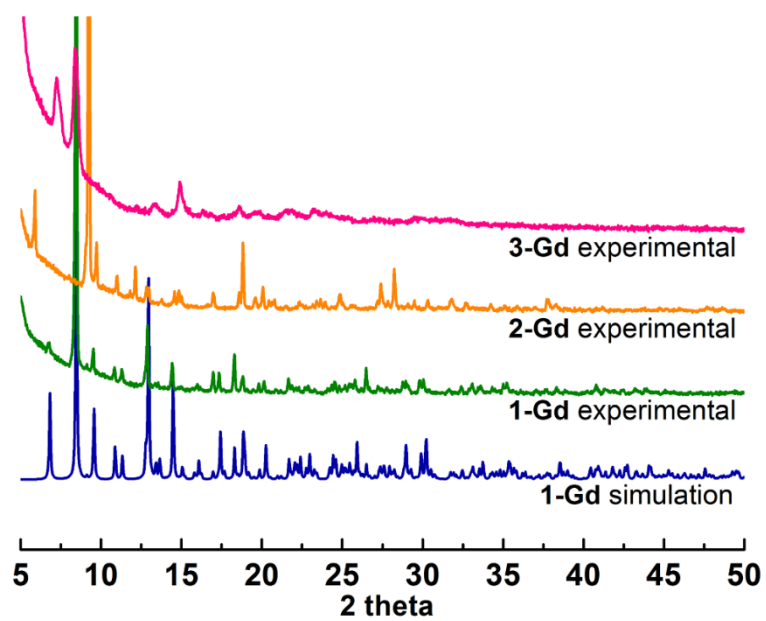

**Figure S11.** PXRD patterns of **1-Gd**, **2-Gd** and **3-Gd**.



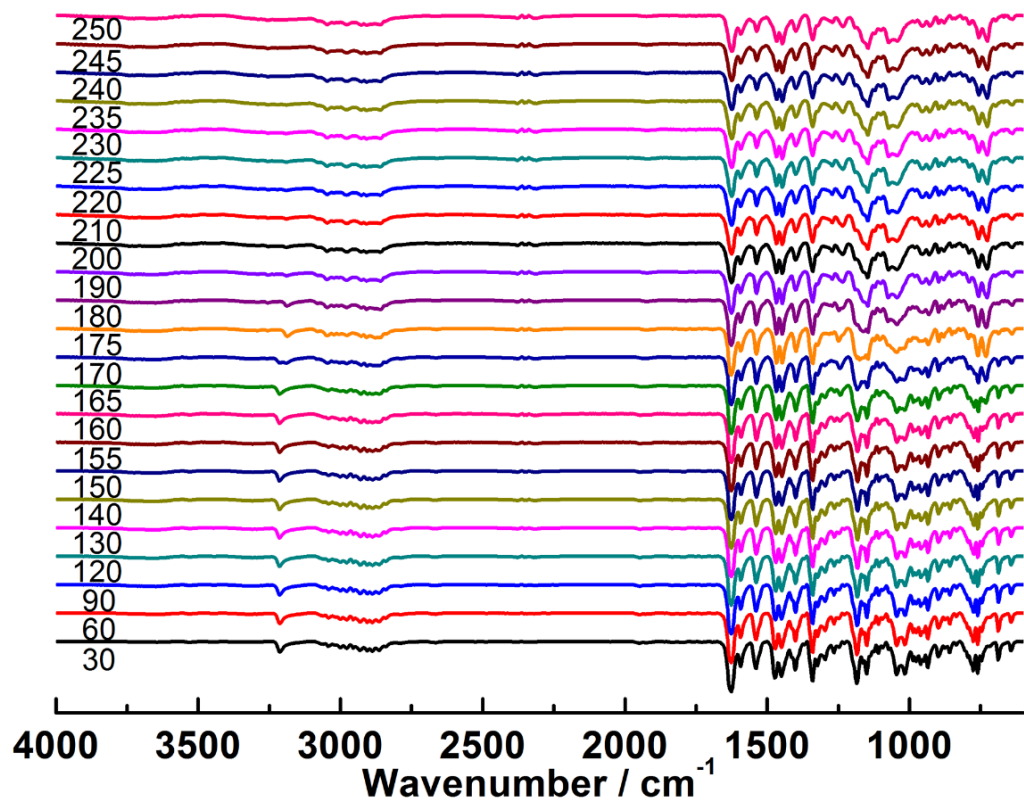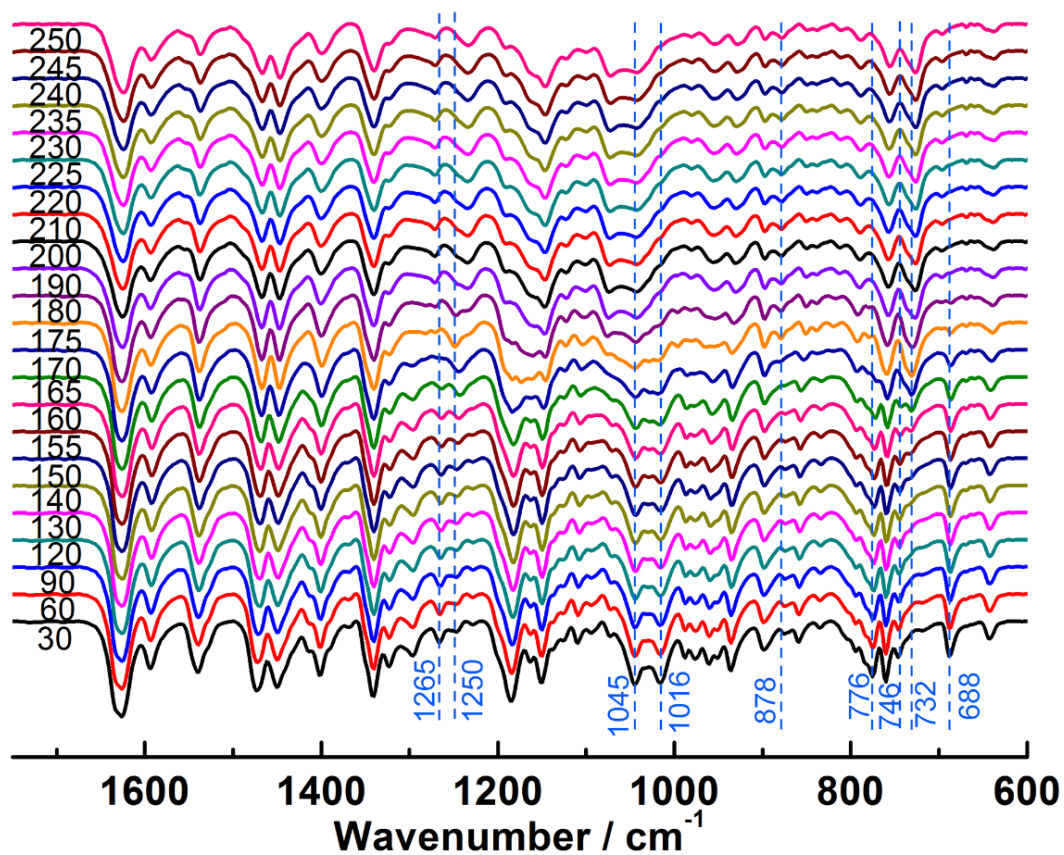

Figure S12. Variable temperature IR spectra for compound 1-Dy.

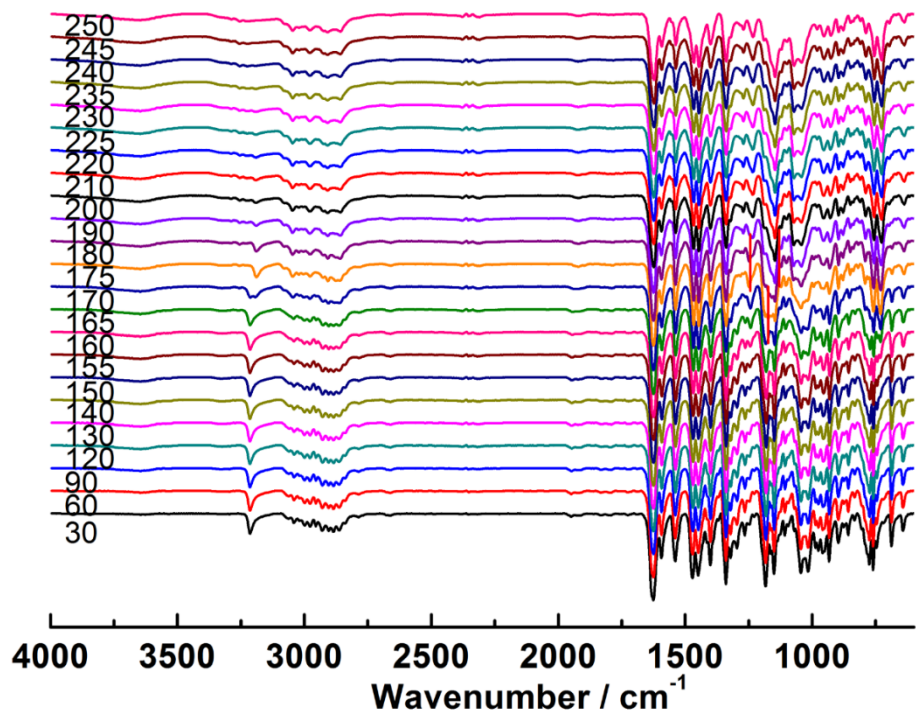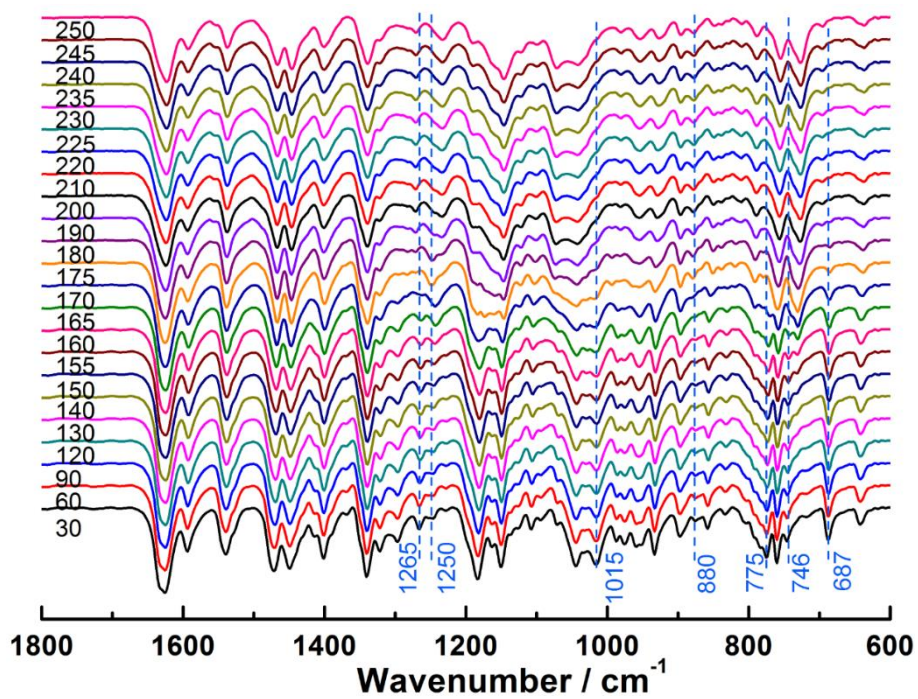

Figure S13. Variable temperature IR spectra for compound 1-Gd.

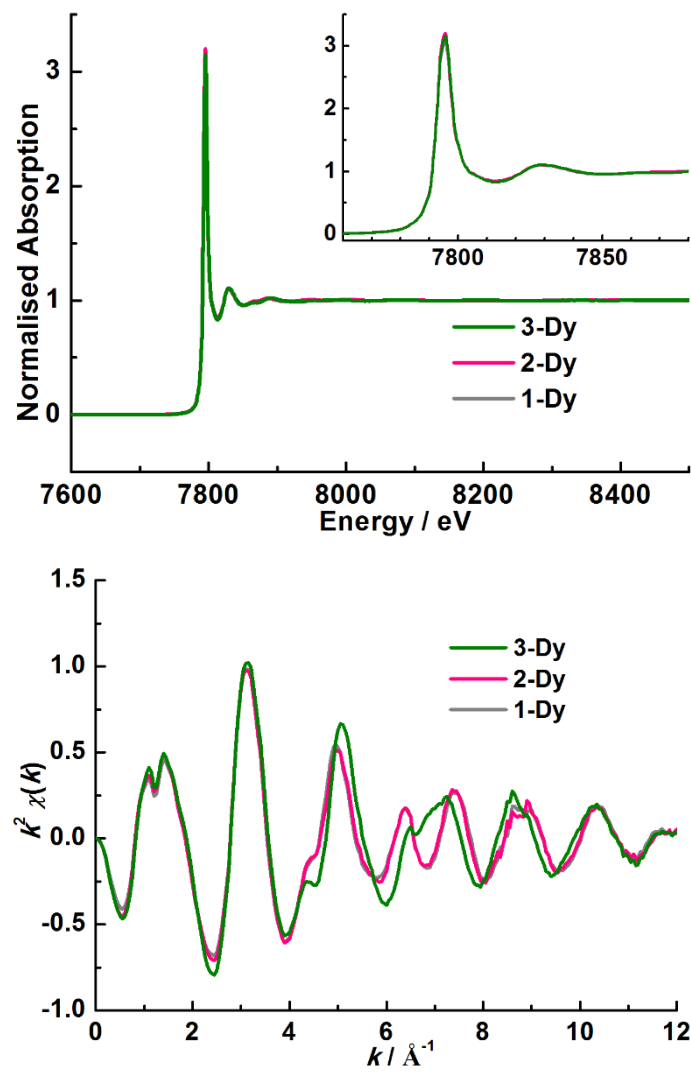

**Figure S14.** The XANES spectra (top) and  $k^2$ -weight EXAFS signals (bottom) at Dy L<sub>3</sub>-edge for samples 1-Dy, 2-Dy and 3-Dy.

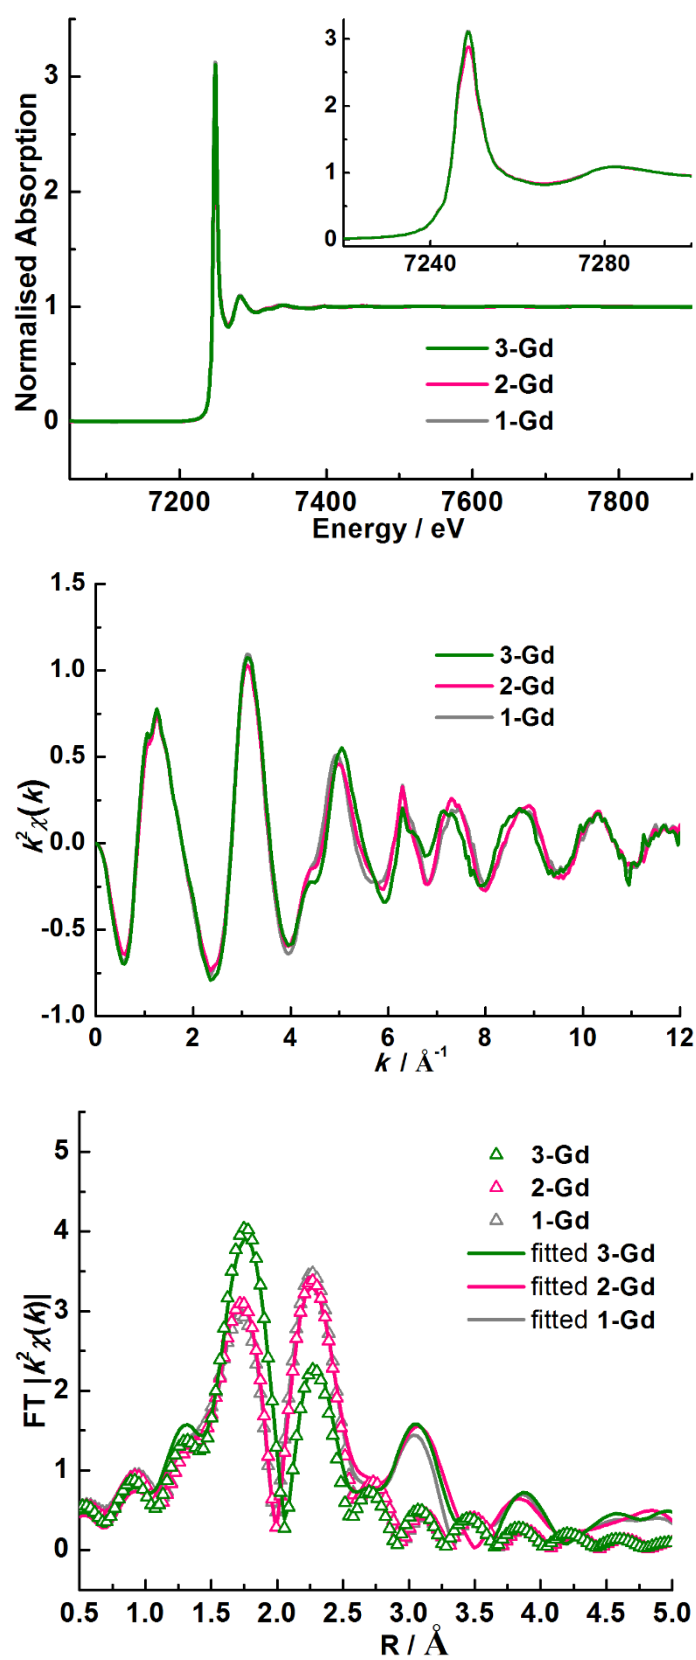

**Figure S15.** The XANES spectra (top),  $k^2$ -weight EXAFS signals (middle) and Fourier transformed space ( $R$  space) (bottom) at Gd L<sub>3</sub>-edge for samples **1-Gd**, **2-Gd** and **3-Gd**.

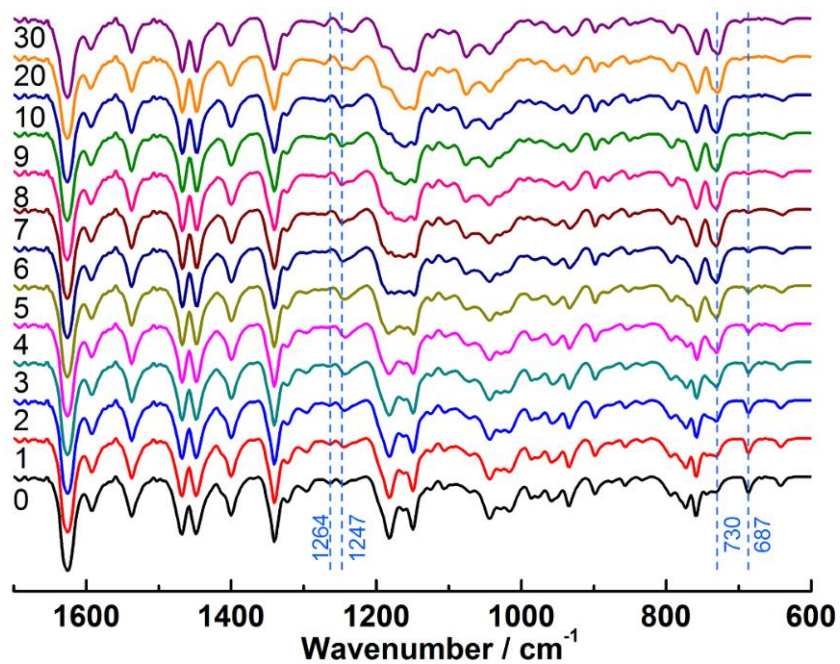

**Figure S16.** In-situ infrared spectra of compound **1-Dy** at 170 °C (heating time varied from 0 to 30 minutes).

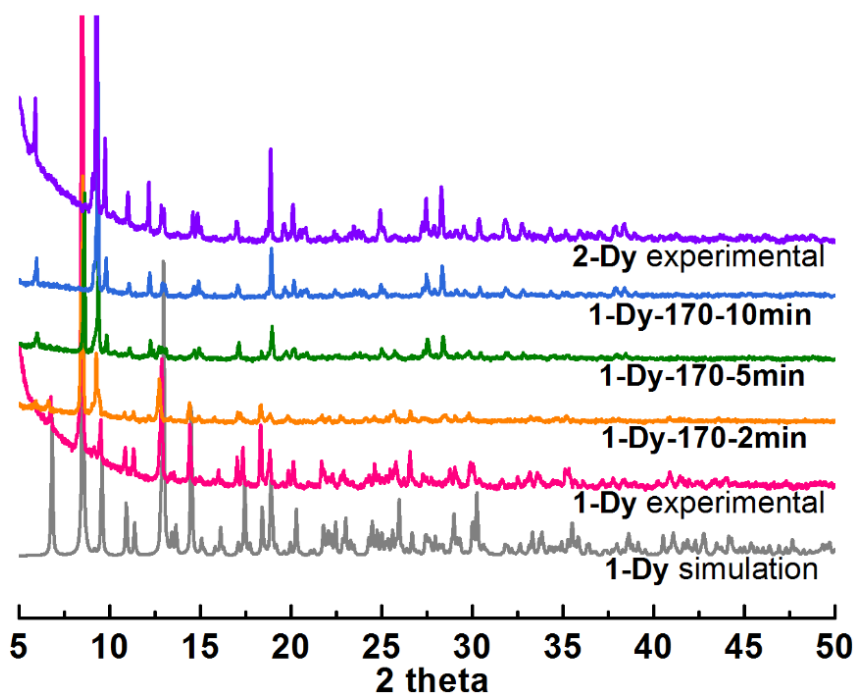

**Figure S17.** PXRD patterns of **1-Dy**, **1-Dy-170-2min**, **1-Dy-170-5min**, **1-Dy-170-10min** and **2-Dy**.

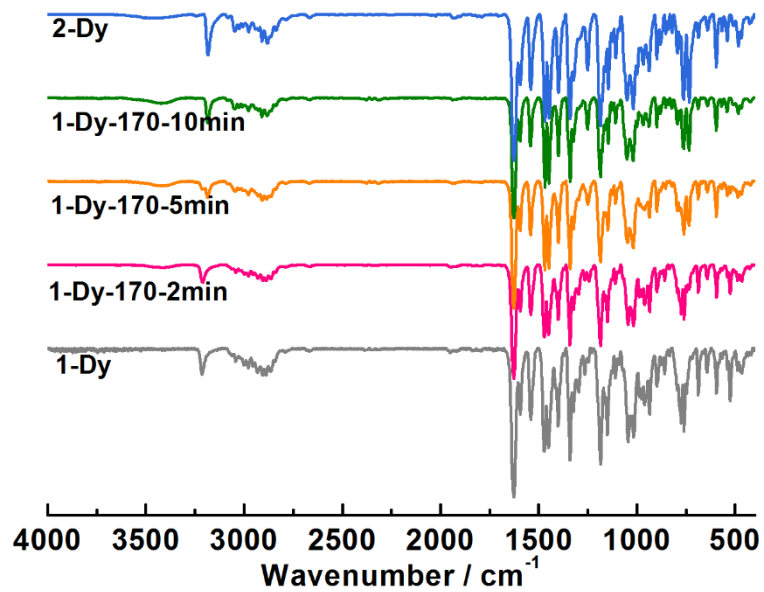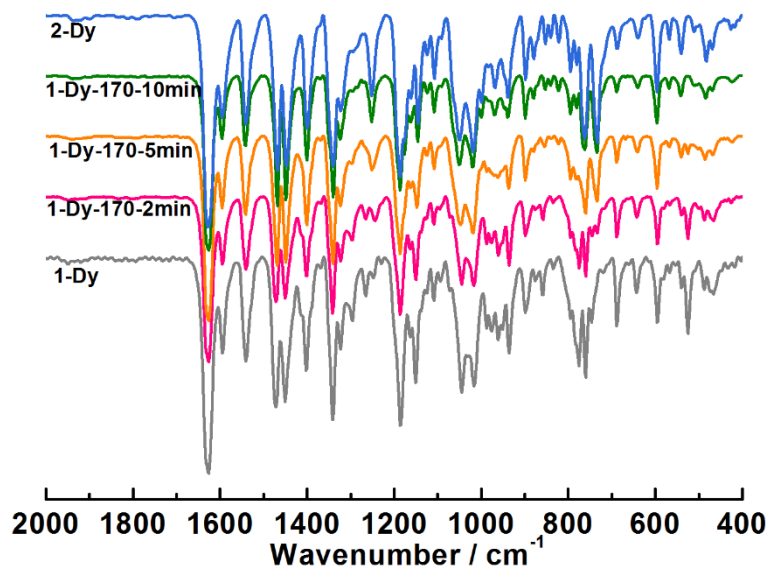

**Figure S18.** Infrared spectra of compounds **1-Dy**, **1-Dy-170-2min**, **1-Dy-170-5min**, **1-Dy-170-10min** and **2-Dy**.

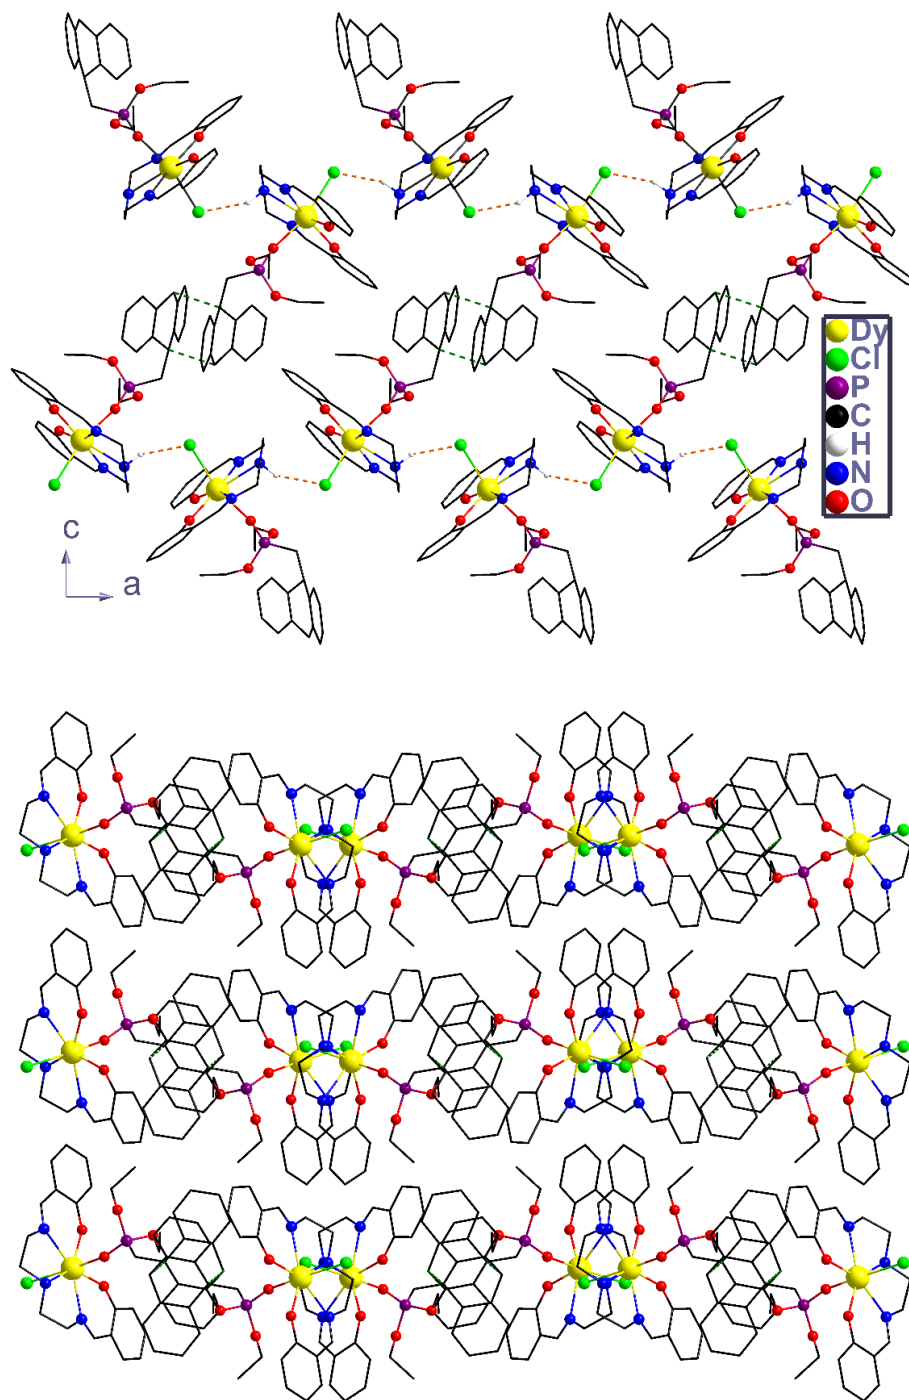

**Figure S19.** Layer structure of compound **1-Dy-170-2min** formed by hydrogen bond (top); Packing diagram of compound **1-Dy-170-2min** viewed along the a-axis (bottom).

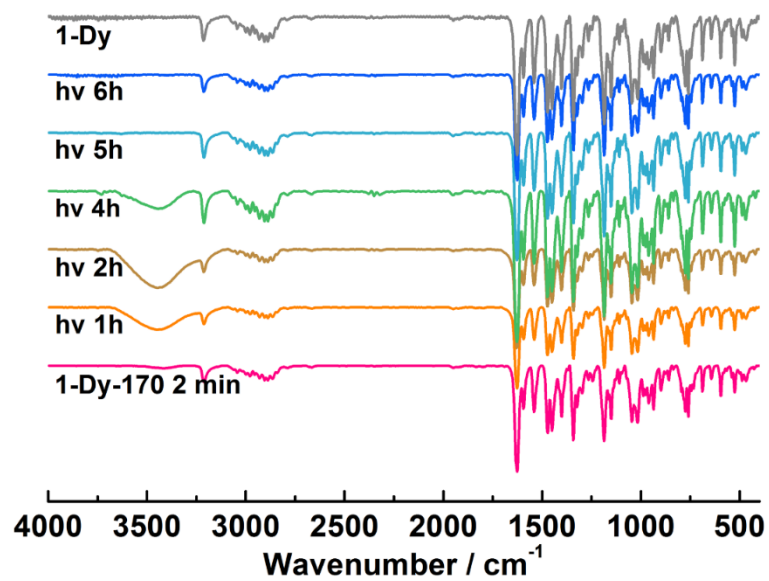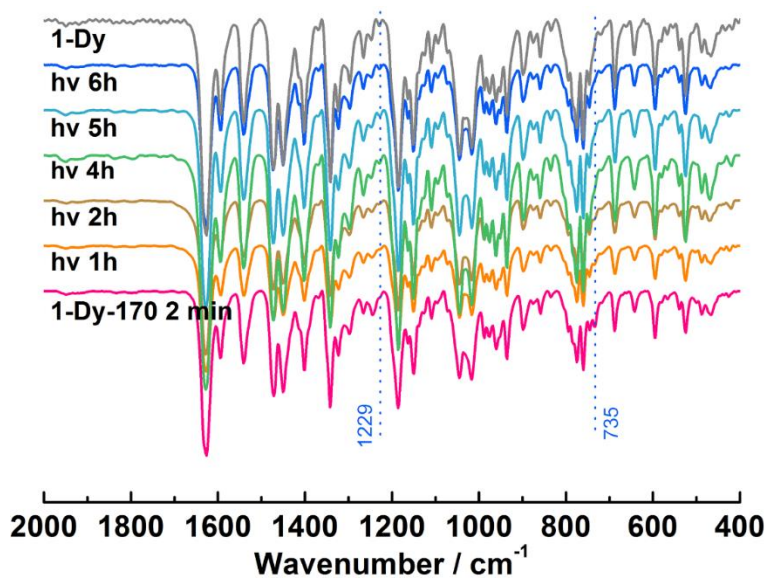

**Figure S20.** IR spectra of 1-Dy (grey), 1-Dy-170-2min (pink) and 1-Dy-170-2min after UV light ( $\lambda = 365 \text{ nm}$ ) irradiation for 1-6 h.



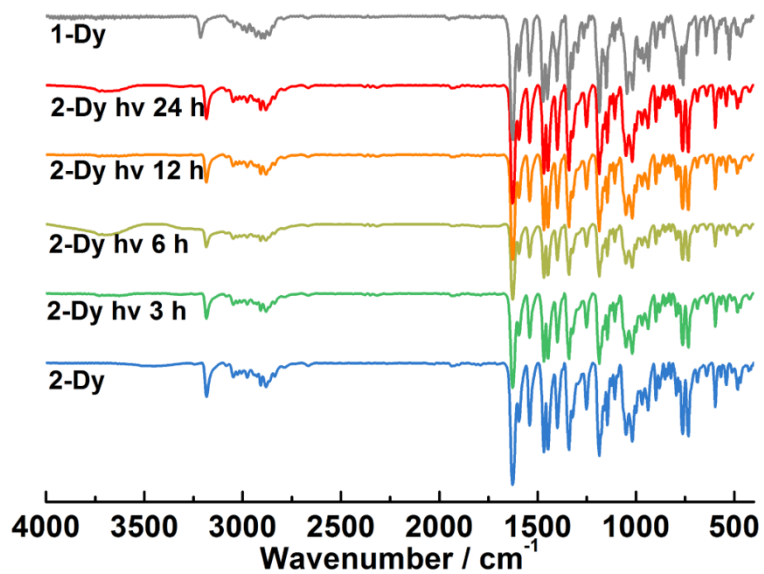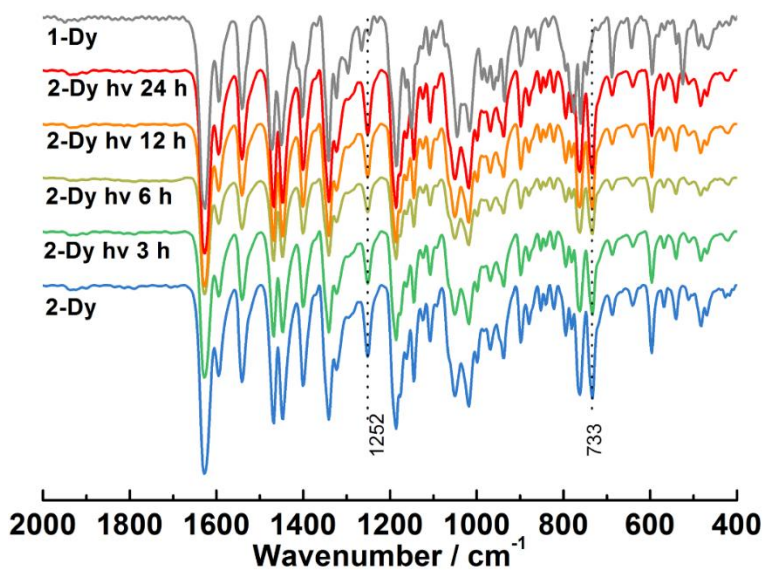

**Figure S21.** IR spectra of **1-Dy** (grey), **2-Dy** (blue) and **2-Dy** after UV light ( $\lambda = 365$  nm) irradiation for different period of time.

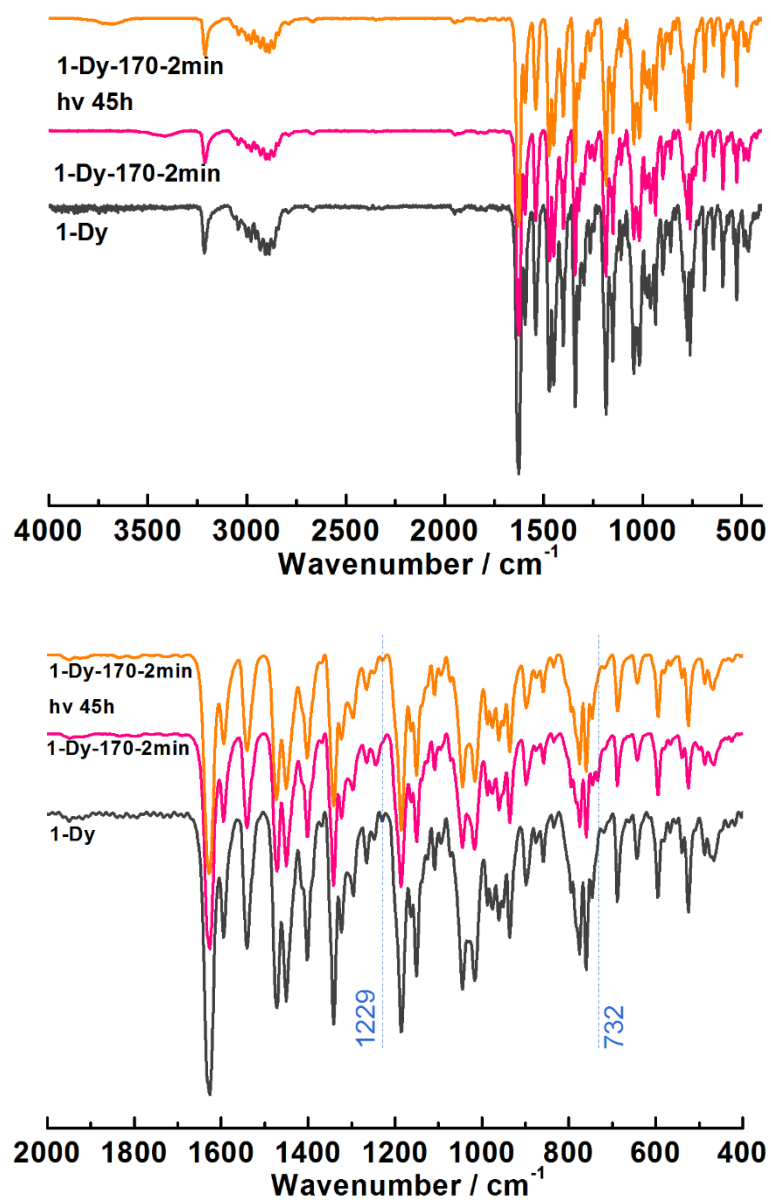

**Figure S22.** IR spectra of **1-Dy** (grey), **1-Dy-170-2min** (pink) and **1-Dy-170-2min** after UV light ( $\lambda = 365$  nm) irradiation for 45 h (orange).

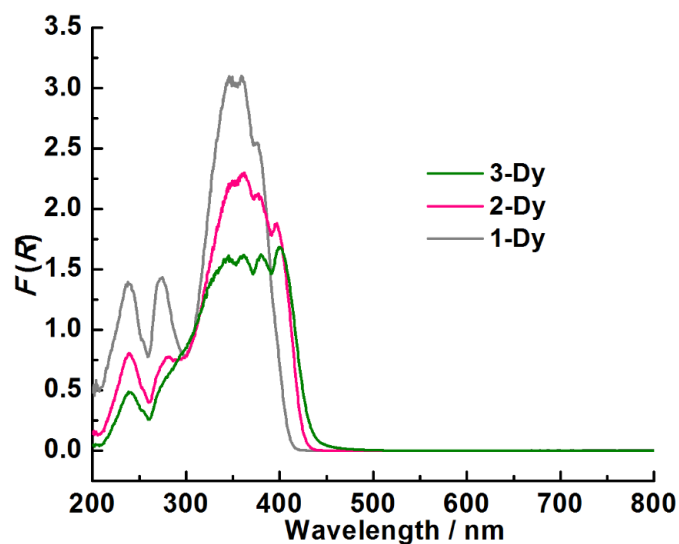

**Figure S23.** The transformed Kubelka–Munk function [ $F(R) = (1-R)^2/2R$ ] (bottom) for compounds **1-Dy**, **2-Dy** and **3-Dy**.

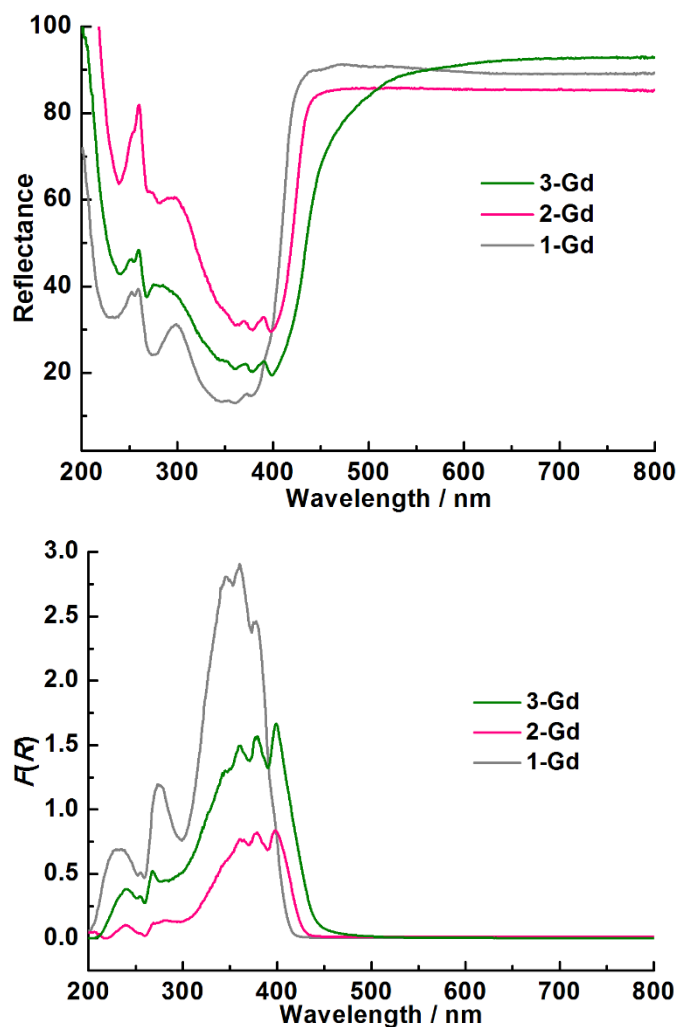

**Figure S24.** The UV-vis reflectance spectra (top) and transformed Kubelka–Munk function [ $F(R) = (1-R)^2/2R$ ] (bottom) for compounds **1-Gd**, **2-Gd** and **3-Gd**.

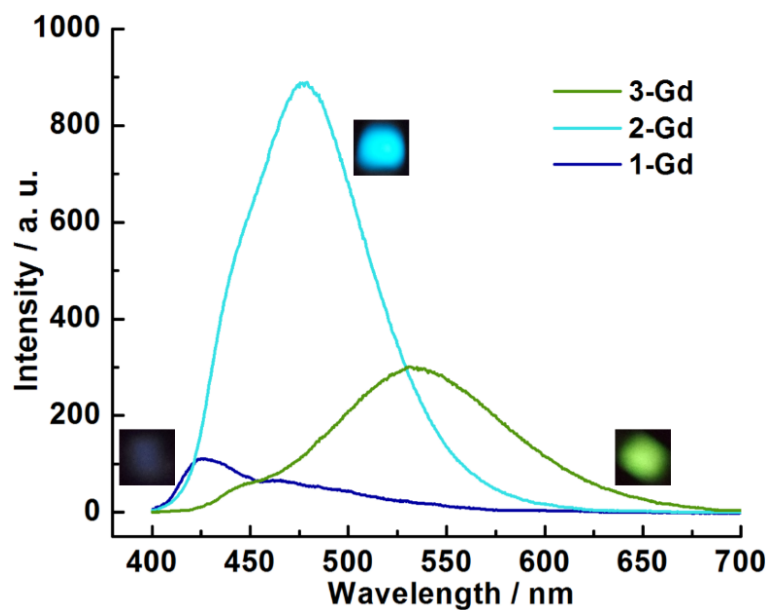

**Figure S25.** The emission spectra excited at 310 nm for compounds **1-Gd**, **2-Gd** min and **3-Gd**. The inset shows corresponding luminescent pictures.

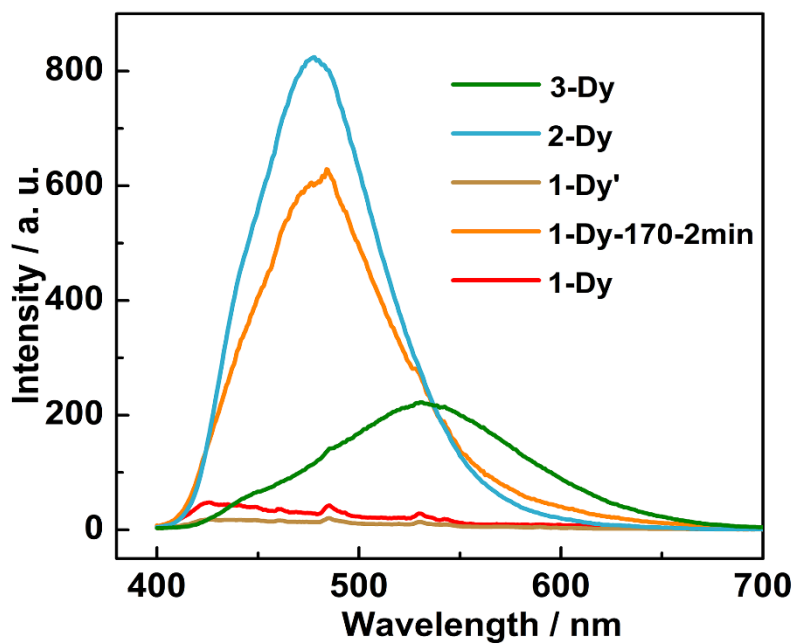

**Figure S26.** The emission spectra excited at 310 nm for **1-Dy**, **1-Dy-170-2min**, **1-Dy'**, **2-Dy** and **3-Dy**.

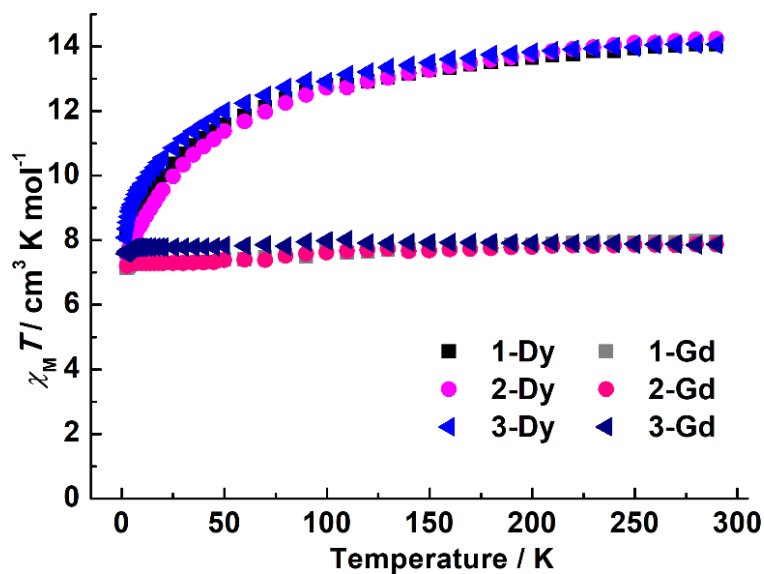

**Figure S27.** Temperature dependence of  $\chi_M T$  on cooling in a field of 1 kOe for **1-Dy**, **2-Dy**, **3-Dy**, **1-Gd**, **2-Gd** and **3-Gd**. The  $\chi_M T$  products at room temperature are 14.06, 14.23, 14.05, 7.96, 7.89 and 7.86  $\text{cm}^3 \text{K mol}^{-1}$  for **1-Dy**, **2-Dy**, **3-Dy**, **1-Gd**, **2-Gd** and **3-Gd**.

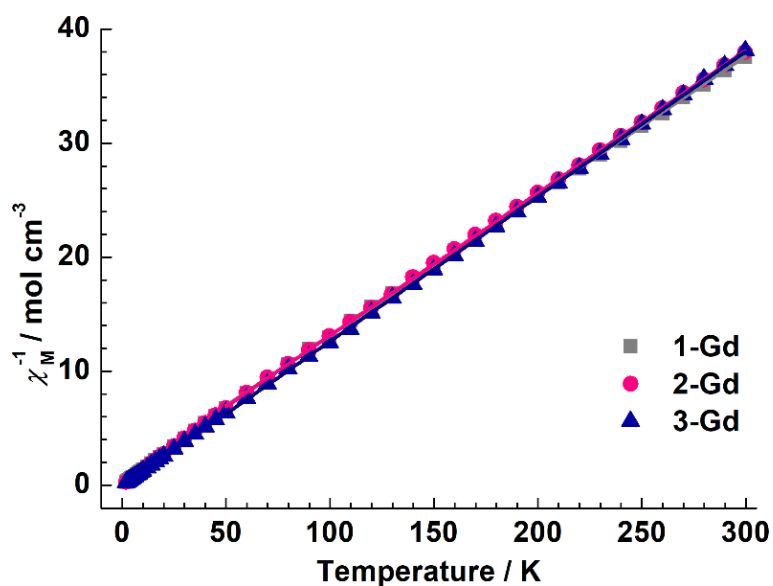

**Figure S28.** Temperature dependence of  $\chi_M^{-1}$  on cooling in a field of 1 kOe for **1-Gd**, **2-Gd** and **3-Gd**. The solid lines represent the fits to Curie-Weiss law in temperature range of 50 – 300 K to attain Curie constant  $C$  of 8.15, 8.01 and 7.87  $\text{cm}^3 \text{K mol}^{-1}$  and Weiss constant  $\theta$  of -6.91, -5.28 and 0.72 K for compound **1-Gd**, **2-Gd** and **3-Gd**, respectively.

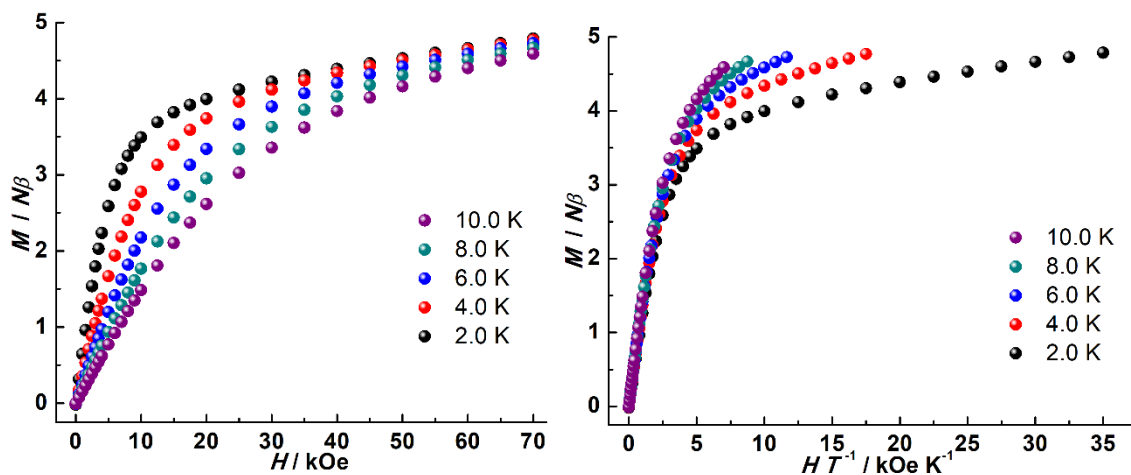

**Figure S29.** Field dependence of magnetization (left) and the plot of magnetization  $M$  versus  $H/T$  (right) at depicted temperatures for **1-Dy**.

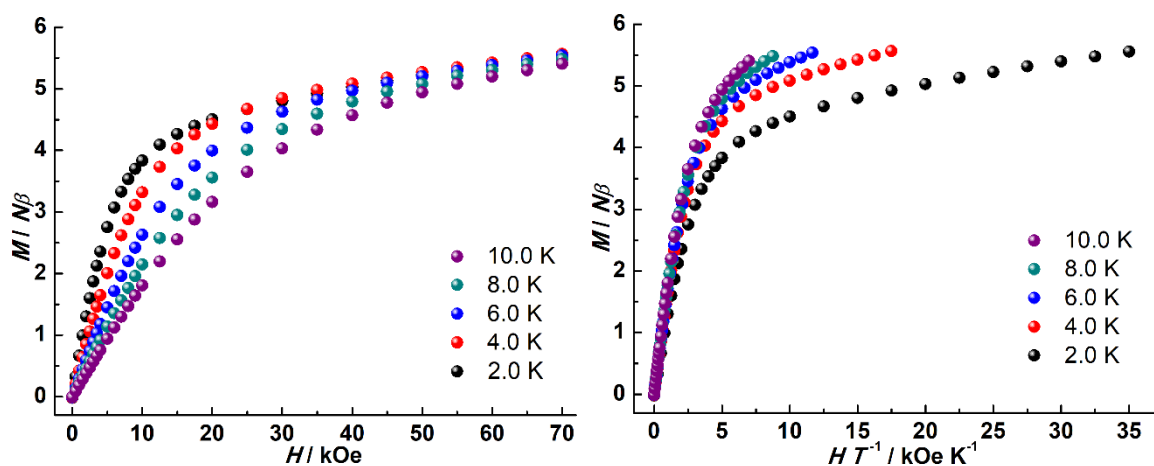

**Figure S30.** Field dependence of magnetization (left) and the plot of magnetization  $M$  versus  $H/T$  (right) at depicted temperatures for **2-Dy**.

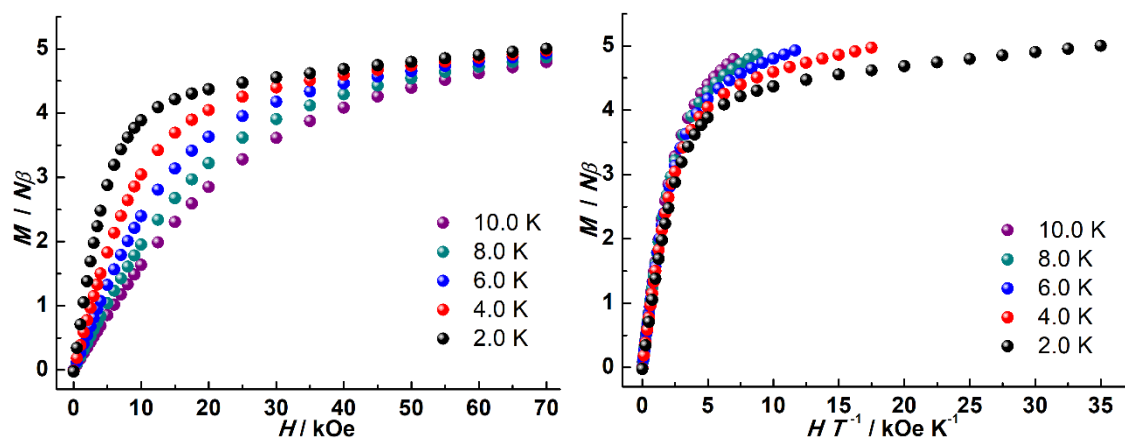

**Figure S31.** Field dependence of magnetization (left) and the plot of magnetization  $M$  versus  $H/T$  (right) at depicted temperatures for **3-Dy**.

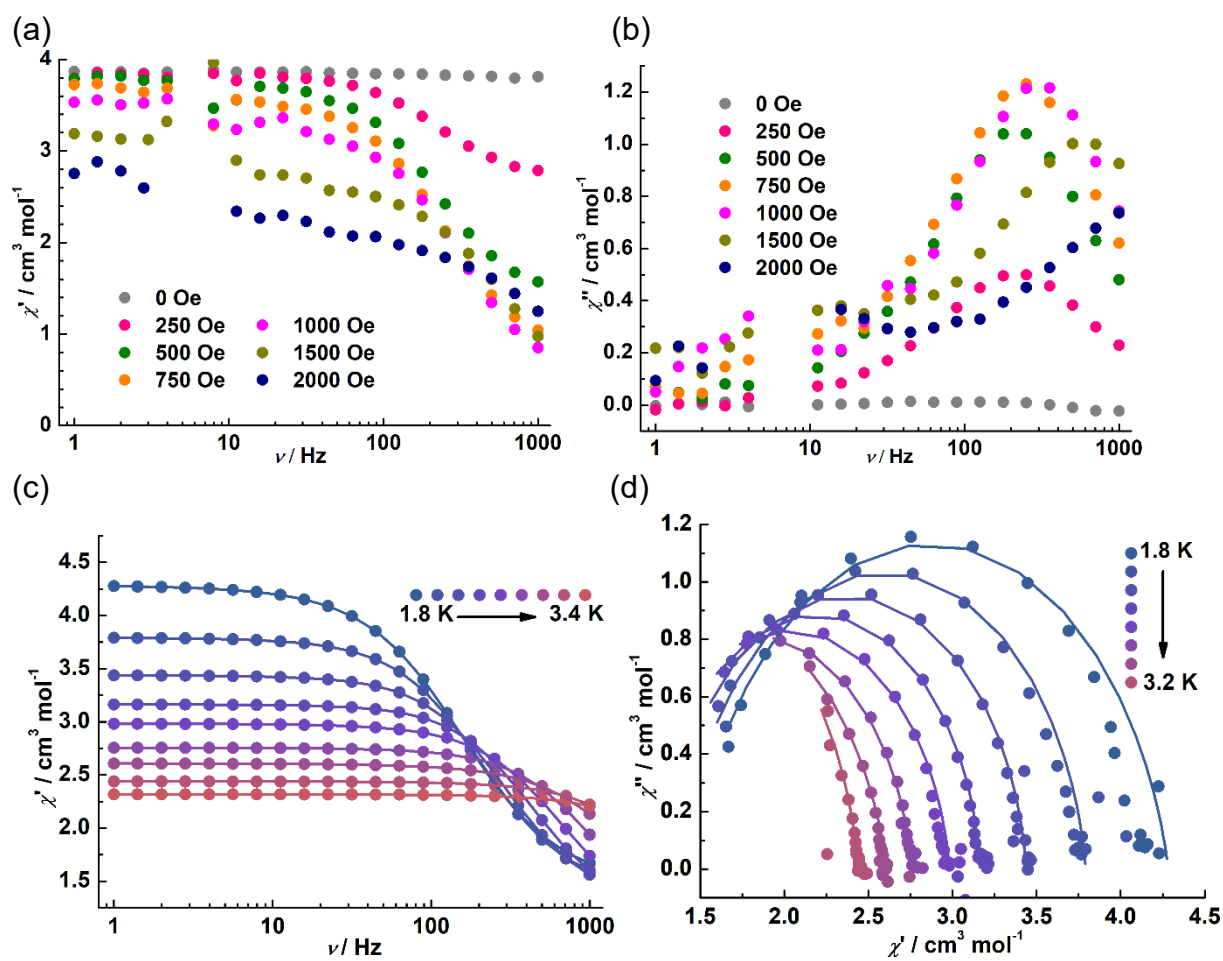

**Figure S32.** Frequency dependence of in-phase ( $\chi'$ , a) and out-of-phase ( $\chi''$ , b) signals of **1-Dy** in the indicated dc fields at 2.0 K. Frequency dependence of the in-phase ( $\chi'$ , c) ac susceptibilities and Cole-Cole plots (d) for **1-Dy**, measured in the temperature range 1.8-3.4 K under 500 Oe dc field.

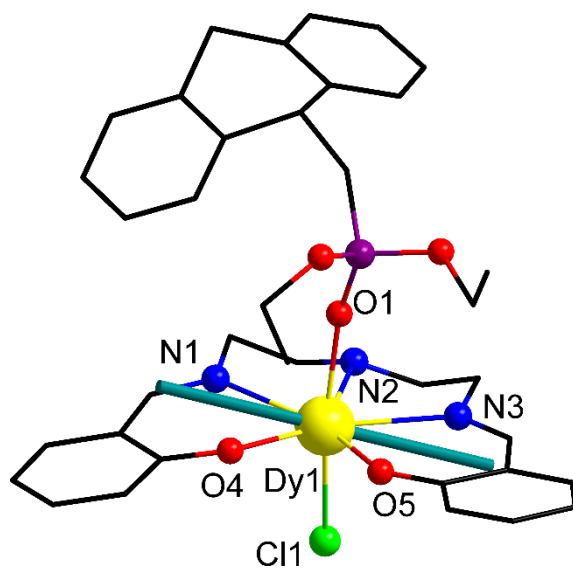

**Figure S33.** The electrostatic (cyan rod) anisotropy direction for the ground Kramer's doublet in **1-Dy**.

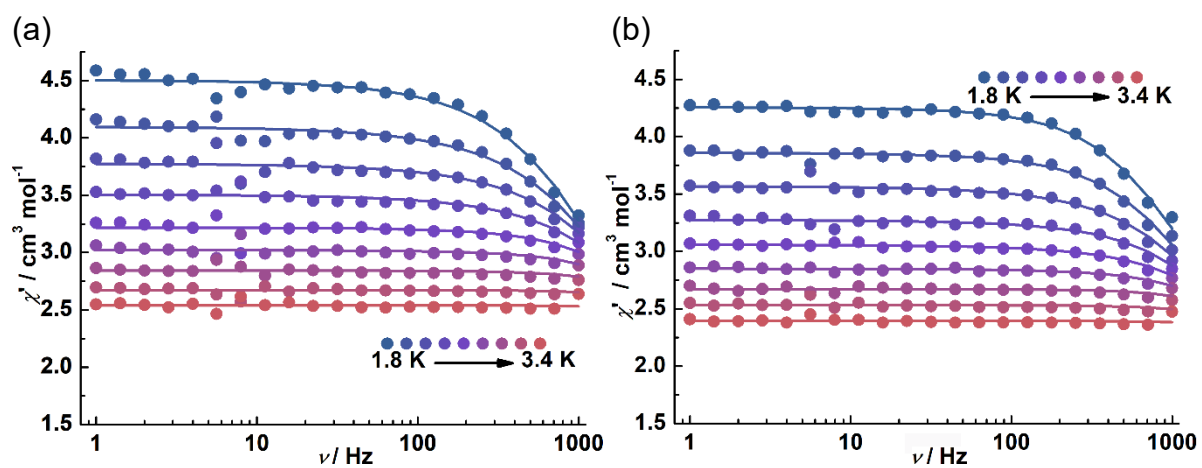

**Figure S34.** Frequency dependence of the in-phase ( $\chi'$ ) ac susceptibilities for **1-Dy-170-2min** (a) and **2-Dy** (b) in a 500 Oe dc field.



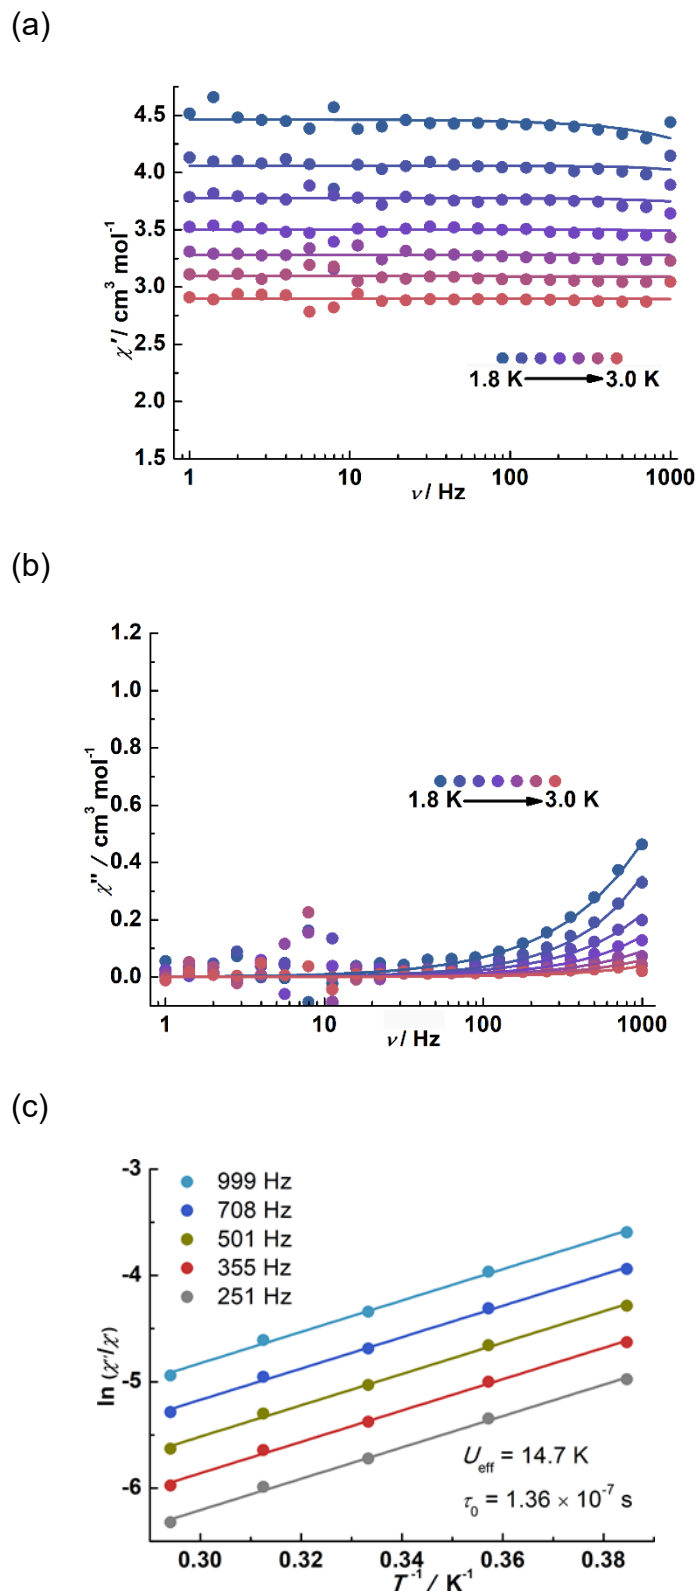

**Figure S35.** Frequency dependence of the in-phase ( $\chi'$ , a) and out-of-phase ( $\chi''$ , b) ac susceptibilities and corresponding plots of  $\ln(\chi''/\chi')$  versus  $T^{-1}$  (c) for **3-Dy** measured in the temperature range 1.8 – 3.0 K under a 500 Oe dc field.

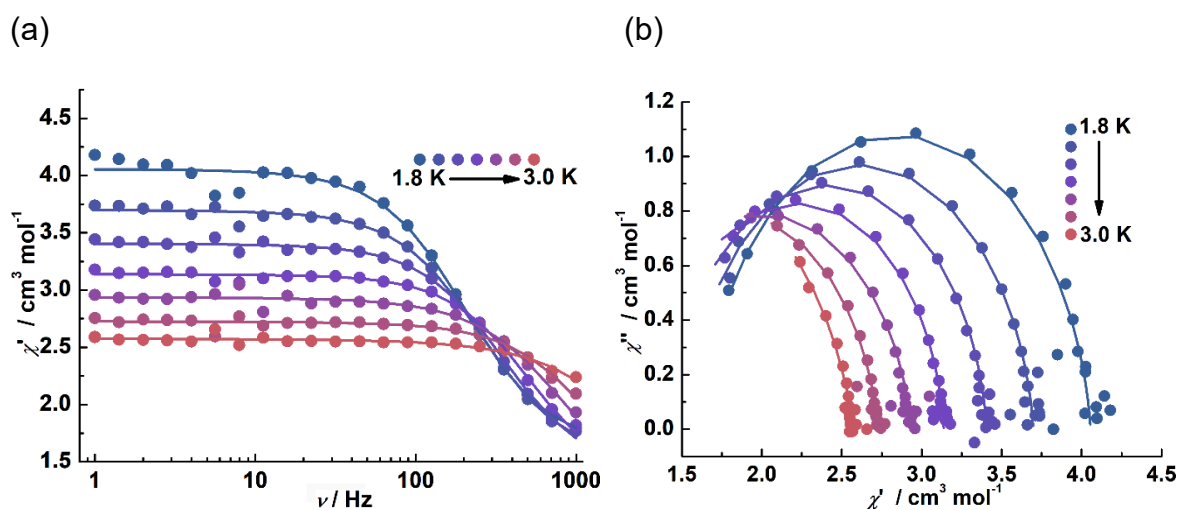

**Figure S36.** Frequency dependence of the in-phase ( $\chi'$ , a) ac susceptibilities and Cole-Cole plots (b) for  $1\text{-Dy}^{3+}$  under 500 Oe dc field.
